# Supplementary material for: Association between PAI-1 Polymorphisms and Ischemic Stroke in a South Korean Case-Control Cohort
Source: MDPI journal article supplement (doi:10.3390/ijms24098041), 2023-04-28
Supplement: s1 [file s1]

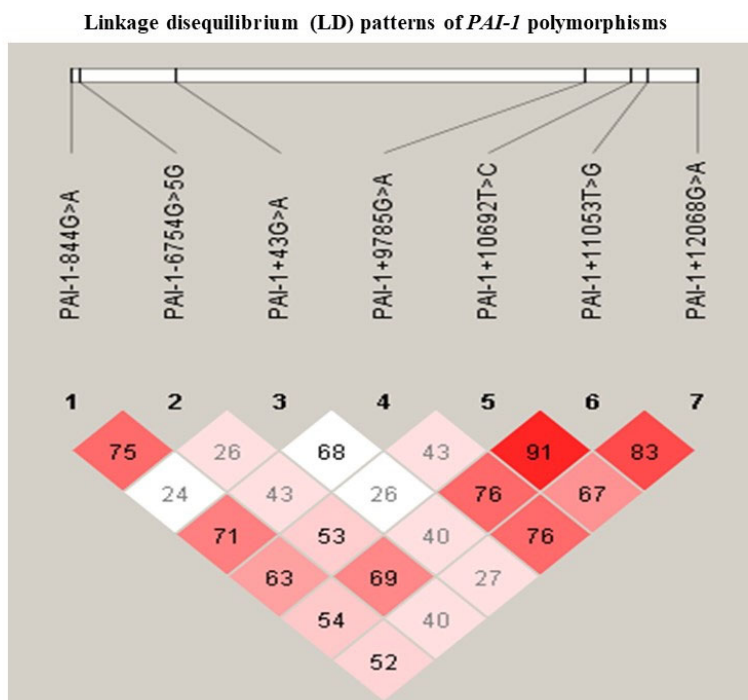

**Supplementary Figure S1.** The linkage disequilibrium (LD) block structure consisted of the seven SNPs located *PAI-1*. The LD pattern was derived from using both stroke patients and healthy control subjects. The LD block was defined by a  $D'$  value threshold of 0.8. The color scale ranges from red to white (color intensity decreases with decreasing  $D'$  value). This locus was identified as one block, and the plot was generated by Haploview.
