# Supplementary material for: Association between PAI-1 Polymorphisms and Ischemic Stroke in a South Korean Case-Control Cohort
Source: MDPI journal article supplement (doi:10.3390/ijms24098041), 2023-04-28
Supplement: s1 [file s1]

Supplementary Table S1. Haplotype for the *PAI-I* seven polymorphisms in ischemic stroke patients, metabolic syndrome patients and controls by MDR

| Characteristics                                                          | MetS<br>controls<br>(2n=1528) | MetS<br>patients<br>(2n=470) | OR (95% CI)                  | <i>P</i> <sup>a</sup> | Stroke<br>controls<br>(2n=850) | Stroke<br>patients<br>(2n=1148) | OR (95% CI)                      | <i>P</i> <sup>a</sup> |
|--------------------------------------------------------------------------|-------------------------------|------------------------------|------------------------------|-----------------------|--------------------------------|---------------------------------|----------------------------------|-----------------------|
| <i>PAI-I</i> -844G>A/-675 4G>5G/43G>A/9785G>A/10692T>C/11053T>G/12068G>A |                               |                              |                              |                       |                                |                                 |                                  |                       |
| G-4G-G-G-T-T-G                                                           | 24 (1.6)                      | 10 (2.2)                     | 1.000 (reference)            |                       | 18 (2.1)                       | 16 (1.4)                        | 1.000 (reference)                |                       |
| G-4G-G-G-T-T-A                                                           | 15 (1.0)                      | 7 (1.5)                      | 1.120 (0.351 - 3.579)        | 1.000                 | 8 (0.9)                        | 17 (1.5)                        | 2.391 (0.814 - 7.020)            | 0.122                 |
| G-4G-G-G-T-G-G                                                           | 169 (11.0)                    | 63 (13.4)                    | 0.895 (0.405 - 1.976)        | 0.837                 | 78 (9.1)                       | 156 (13.6)                      | 2.250 (1.088 - 4.652)            | 0.035                 |
| G-4G-G-G-T-G-A                                                           | 11 (0.7)                      | 0 (0.0)                      | 0.101 (0.005 - 1.887)        | 0.089                 | 3 (0.3)                        | 8 (0.7)                         | 3.000 (0.677 - 13.290)           | 0.177                 |
| G-4G-G-G-C-T-G                                                           | 12 (0.8)                      | 2 (0.3)                      | 0.400 (0.075 - 2.123)        | 0.465                 | 6 (0.8)                        | 7 (0.6)                         | 1.313 (0.364 - 4.730)            | 0.752                 |
| G-4G-G-G-C-T-A                                                           | 120 (7.8)                     | 31 (6.7)                     | 0.620 (0.269 - 1.432)        | 0.261                 | 70 (8.3)                       | 81 (7.1)                        | 1.302 (0.618 - 2.744)            | 0.570                 |
| G-4G-A-G-T-T-G                                                           | 6 (0.4)                       | 0 (0.0)                      | 0.180 (0.009 - 3.487)        | 0.307                 | 8 (1.0)                        | 0 (0.0)                         | 0.066 (0.004 - 1.234)            | 0.016                 |
| G-4G-A-G-T-G-G                                                           | 5 (0.3)                       | 2 (0.4)                      | 0.960 (0.159 - 5.799)        | 1.000                 | 7 (0.8)                        | 0 (0.0)                         | 0.075 (0.004 - 1.413)            | 0.031                 |
| G-4G-A-G-C-T-A                                                           | 11 (0.7)                      | 1 (0.2)                      | 0.218 (0.025 - 1.923)        | 0.242                 | 7 (0.8)                        | 4 (0.3)                         | 0.643 (0.158 - 2.610)            | 0.730                 |
| G-5G-G-G-T-T-G                                                           | 25 (1.6)                      | 7 (1.5)                      | 0.672 (0.220 - 2.053)        | 0.578                 | 21 (2.5)                       | 13 (1.1)                        | 0.696 (0.265 - 1.829)            | 0.624                 |
| G-5G-G-G-T-T-A                                                           | 33 (2.1)                      | 19 (4.1)                     | 1.382 (0.546 - 3.499)        | 0.641                 | 18 (2.1)                       | 30 (2.6)                        | 1.875 (0.769 - 4.574)            | 0.183                 |
| G-5G-G-G-T-G-G                                                           | 60 (3.9)                      | 11 (2.2)                     | 0.440 (0.165 - 1.171)        | 0.120                 | 36 (4.2)                       | 35 (3.0)                        | 1.094 (0.482 - 2.480)            | 0.838                 |
| G-5G-G-G-C-T-G                                                           | 55 (3.6)                      | 18 (3.7)                     | 0.786 (0.316 - 1.951)        | 0.641                 | 34 (4.0)                       | 39 (3.4)                        | 1.290 (0.571 - 2.917)            | 0.678                 |
| G-5G-G-G-C-T-A                                                           | 244 (16.0)                    | 64 (13.5)                    | 0.630 (0.286 - 1.384)        | 0.273                 | 131 (15.4)                     | 168 (14.6)                      | 1.443 (0.708 - 2.938)            | 0.364                 |
| G-5G-G-G-C-G-A                                                           | 7 (0.5)                       | 1 (0.2)                      | 0.343 (0.037 - 3.163)        | 0.657                 | 2 (0.2)                        | 9 (0.8)                         | 5.063 (0.949 - 27.000)           | 0.079                 |
| G-5G-G-A-C-T-G                                                           | 32 (2.1)                      | 8 (1.6)                      | 0.600 (0.206 - 1.749)        | 0.420                 | 12 (1.5)                       | 29 (2.5)                        | 2.719 (1.049 - 7.045)            | 0.058                 |
| G-5G-A-G-T-T-G                                                           | 2 (0.2)                       | 4 (0.8)                      | 4.800 (0.754 - 30.560)       | 0.159                 | 0 (0.0)                        | 4 (0.4)                         | 10.090 (0.504 - 202.100)         | 0.107                 |
| G-5G-A-G-T-T-A                                                           | 4 (0.3)                       | 0 (0.0)                      | 0.259 (0.013 - 5.263)        | 0.556                 | 2 (0.3)                        | 5 (0.4)                         | 2.813 (0.478 - 16.560)           | 0.410                 |
| G-5G-A-G-C-T-G                                                           | 5 (0.3)                       | 2 (0.5)                      | 0.960 (0.159 - 5.799)        | 1.000                 | 4 (0.5)                        | 3 (0.3)                         | 0.844 (0.163 - 4.358)            | 1.000                 |
| G-5G-A-G-C-T-A                                                           | 51 (3.4)                      | 17 (3.7)                     | 0.800 (0.319 - 2.007)        | 0.641                 | 24 (2.8)                       | 48 (4.2)                        | 2.250 (0.978 - 5.176)            | 0.060                 |
| A-4G-G-G-T-T-G                                                           | 29 (1.9)                      | 13 (2.8)                     | 1.076 (0.401 - 2.885)        | 1.000                 | 27 (3.2)                       | 16 (1.4)                        | 0.667 (0.267 - 1.664)            | 0.486                 |
| A-4G-G-G-T-T-A                                                           | 15 (1.0)                      | 1 (0.3)                      | 0.160 (0.019 - 1.380)        | 0.080                 | 4 (0.5)                        | 12 (1.0)                        | 3.375 (0.904 - 12.600)           | 0.076                 |
| A-4G-G-G-T-G-G                                                           | 411 (26.9)                    | 126 (26.8)                   | 0.736 (0.343 - 1.580)        | 0.412                 | 245 (28.8)                     | 289 (25.2)                      | 1.327 (0.662 - 2.658)            | 0.480                 |
| A-4G-G-G-T-G-A                                                           | 10 (0.7)                      | 9 (2.0)                      | 2.160 (0.674 - 6.921)        | 0.239                 | 9 (1.1)                        | 13 (1.1)                        | 1.625 (0.549 - 4.807)            | 0.423                 |
| A-4G-G-G-C-T-G                                                           | 4 (0.3)                       | 3 (0.6)                      | 1.800 (0.339 - 9.555)        | 0.659                 | 3 (0.3)                        | 5 (0.4)                         | 1.875 (0.385 - 9.124)            | 0.697                 |
| A-4G-G-G-C-T-A                                                           | 38 (2.5)                      | 10 (2.2)                     | 0.632 (0.229 - 1.743)        | 0.438                 | 17 (2.1)                       | 35 (3.0)                        | 2.316 (0.953 - 5.632)            | 0.075                 |
| A-4G-G-G-C-G-G                                                           | 4 (0.2)                       | 0 (0.0)                      | 0.259 (0.013 - 5.263)        | 0.556                 | 0 (0.0)                        | 5 (0.4)                         | 12.330 (0.632 - 240.600)         | 0.050                 |
| A-4G-A-G-T-G-G                                                           | 26 (1.7)                      | 2 (0.4)                      | <b>0.185 (0.037 - 0.930)</b> | <b>0.050</b>          | 22 (2.6)                       | 3 (0.3)                         | <b>0.153 (0.039 - 0.611)</b>     | <b>0.005</b>          |
| A-5G-G-G-T-T-G                                                           | 5 (0.4)                       | 0 (0.0)                      | 0.212 (0.011 - 4.196)        | 0.302                 | 1 (0.2)                        | 5 (0.4)                         | 5.625 (0.592 - 53.410)           | 0.186                 |
| A-5G-G-G-C-T-A                                                           | 27 (1.8)                      | 11 (2.3)                     | 0.978 (0.353 - 2.706)        | 1.000                 | 0 (0.0)                        | 37 (3.2)                        | <b>84.090 (4.774 - 1481.000)</b> | <b>&lt;0.0001</b>     |
| A-5G-A-G-C-T-A                                                           | 3 (0.2)                       | 3 (0.7)                      | 2.400 (0.412 - 13.990)       | 0.370                 | 0 (0.0)                        | 7 (0.6)                         | <b>16.820 (0.890 - 317.900)</b>  | <b>0.012</b>          |

MetS, metabolic syndrome; 95% CI, 95% confidence interval.

<sup>a</sup> Fisher's exact test.

Supplementary Table S2. Haplotype for the *PAI-1* six polymorphisms in ischemic stroke patients, metabolic syndrome patients and controls by MDR

| Characteristics                                                                           | MetS<br>controls<br>(2n=1528) | MetS<br>patients<br>(2n=470) | OR (95% CI)                  | <i>P</i> <sup>a</sup> | Controls<br>(2n=850) | Stroke<br>patients<br>(2n=1148) | OR (95% CI)                      | <i>P</i> <sup>a</sup> |
|-------------------------------------------------------------------------------------------|-------------------------------|------------------------------|------------------------------|-----------------------|----------------------|---------------------------------|----------------------------------|-----------------------|
| <b><i>PAI-1</i> -844G&gt;A/-675 4G&gt;5G/43G&gt;A/10692T&gt;C/11053T&gt;G/12068G&gt;A</b> |                               |                              |                              |                       |                      |                                 |                                  |                       |
| G-4G-G-T-T-G                                                                              | 29 (1.9)                      | 12 (2.5)                     | 1.000 (reference)            |                       | 21 (2.5)             | 19 (1.7)                        | 1.000 (reference)                |                       |
| G-4G-G-T-T-A                                                                              | 18 (1.2)                      | 7 (1.4)                      | 0.940 (0.312 - 2.830)        | 1.000                 | 10 (1.2)             | 17 (1.5)                        | 1.879 (0.693 - 5.097)            | 0.318                 |
| G-4G-G-T-G-G                                                                              | 170 (11.1)                    | 65 (13.8)                    | 0.924 (0.445 - 1.920)        | 0.851                 | 77 (9.0)             | 158 (13.8)                      | <b>2.268 (1.151 - 4.467)</b>     | <b>0.020</b>          |
| G-4G-G-T-G-A                                                                              | 11 (0.7)                      | 0 (0.0)                      | 0.103 (0.006 - 1.881)        | 0.050                 | 4 (0.4)              | 9 (0.8)                         | 2.487 (0.657 - 9.418)            | 0.213                 |
| G-4G-G-C-T-G                                                                              | 17 (1.1)                      | 2 (0.4)                      | 0.284 (0.057 - 1.426)        | 0.189                 | 8 (0.9)              | 9 (0.8)                         | 1.243 (0.399 - 3.876)            | 0.777                 |
| G-4G-G-C-T-A                                                                              | 118 (7.8)                     | 31 (6.6)                     | 0.635 (0.291 - 1.386)        | 0.293                 | 71 (8.3)             | 80 (7.0)                        | 1.245 (0.620 - 2.503)            | 0.595                 |
| G-4G-A-T-T-G                                                                              | 7 (0.4)                       | 0 (0.0)                      | 0.157 (0.008 - 2.973)        | 0.169                 | 8 (1.0)              | 0 (0.0)                         | 0.065 (0.004 - 1.200)            | 0.015                 |
| G-4G-A-T-G-G                                                                              | 5 (0.4)                       | 2 (0.4)                      | 0.967 (0.164 - 5.692)        | 1.000                 | 8 (1.0)              | 0 (0.0)                         | 0.065 (0.004 - 1.200)            | 0.015                 |
| G-4G-A-C-T-G                                                                              | 1 (0.1)                       | 2 (0.3)                      | 4.833 (0.399 - 58.500)       | 0.234                 | 3 (0.4)              | 0 (0.0)                         | 0.158 (0.008 - 3.249)            | 0.243                 |
| G-4G-A-C-T-A                                                                              | 12 (0.8)                      | 1 (0.2)                      | 0.201 (0.023 - 1.726)        | 0.151                 | 6 (0.7)              | 4 (0.4)                         | 0.737 (0.180 - 3.017)            | 0.736                 |
| G-4G-A-C-G-G                                                                              | 3 (0.2)                       | 0 (0.0)                      | 0.337 (0.016 - 7.026)        | 0.551                 | 1 (0.2)              | 2 (0.2)                         | 2.211 (0.185 - 26.400)           | 0.607                 |
| G-5G-G-T-T-G                                                                              | 28 (1.8)                      | 7 (1.5)                      | 0.604 (0.208 - 1.757)        | 0.430                 | 21 (2.5)             | 16 (1.4)                        | 0.842 (0.343 - 2.070)            | 0.820                 |
| G-5G-G-T-T-A                                                                              | 32 (2.1)                      | 20 (4.2)                     | 1.510 (0.630 - 3.622)        | 0.387                 | 17 (2.0)             | 30 (2.6)                        | 1.950 (0.825 - 4.609)            | 0.137                 |
| G-5G-G-T-G-G                                                                              | 59 (3.9)                      | 11 (2.3)                     | 0.451 (0.178 - 1.143)        | 0.097                 | 36 (4.2)             | 34 (3.0)                        | 1.044 (0.480 - 2.272)            | 1.000                 |
| G-5G-G-T-G-A                                                                              | 9 (0.6)                       | 1 (0.3)                      | 0.269 (0.031 - 2.360)        | 0.419                 | 5 (0.6)              | 5 (0.4)                         | 1.105 (0.276 - 4.422)            | 1.000                 |
| G-5G-G-C-T-G                                                                              | 88 (5.8)                      | 26 (5.5)                     | 0.714 (0.320 - 1.593)        | 0.406                 | 47 (5.5)             | 69 (6.0)                        | 1.623 (0.787 - 3.344)            | 0.201                 |
| G-5G-G-C-T-A                                                                              | 247 (16.1)                    | 62 (13.3)                    | 0.607 (0.293 - 1.257)        | 0.220                 | 134 (15.8)           | 167 (14.5)                      | 1.377 (0.711 - 2.668)            | 0.399                 |
| G-5G-G-C-G-G                                                                              | 2 (0.1)                       | 2 (0.4)                      | 2.417 (0.304 - 19.200)       | 0.578                 | 2 (0.2)              | 2 (0.2)                         | 1.105 (0.141 - 8.640)            | 1.000                 |
| G-5G-G-C-G-A                                                                              | 8 (0.5)                       | 1 (0.3)                      | 0.302 (0.034 - 2.687)        | 0.414                 | 3 (0.4)              | 9 (0.8)                         | 3.316 (0.780 - 14.090)           | 0.113                 |
| G-5G-A-T-T-G                                                                              | 4 (0.2)                       | 4 (0.8)                      | 2.417 (0.518 - 11.280)       | 0.411                 | 0 (0.0)              | 5 (0.4)                         | 12.130 (0.629 - 234.000)         | 0.051                 |
| G-5G-A-T-T-A                                                                              | 4 (0.3)                       | 0 (0.0)                      | 0.262 (0.013 - 5.248)        | 0.561                 | 4 (0.4)              | 4 (0.4)                         | 1.105 (0.242 - 5.048)            | 1.000                 |
| G-5G-A-C-T-G                                                                              | 5 (0.3)                       | 2 (0.4)                      | 0.967 (0.164 - 5.692)        | 1.000                 | 4 (0.4)              | 3 (0.2)                         | 0.829 (0.164 - 4.192)            | 1.000                 |
| G-5G-A-C-T-A                                                                              | 51 (3.3)                      | 17 (3.7)                     | 0.806 (0.338 - 1.920)        | 0.659                 | 23 (2.7)             | 48 (4.2)                        | <b>2.307 (1.041 - 5.109)</b>     | <b>0.045</b>          |
| A-4G-G-T-T-G                                                                              | 28 (1.9)                      | 17 (3.6)                     | 1.467 (0.595 - 3.621)        | 0.495                 | 27 (3.2)             | 19 (1.7)                        | 0.778 (0.331 - 1.828)            | 0.665                 |
| A-4G-G-T-T-A                                                                              | 16 (1.1)                      | 1 (0.3)                      | 0.151 (0.018 - 1.271)        | 0.083                 | 5 (0.6)              | 12 (1.0)                        | 2.653 (0.788 - 8.933)            | 0.149                 |
| A-4G-G-T-G-G                                                                              | 410 (26.8)                    | 125 (26.5)                   | 0.737 (0.365 - 1.487)        | 0.446                 | 243 (28.6)           | 288 (25.1)                      | 1.310 (0.688 - 2.494)            | 0.417                 |
| A-4G-G-T-G-A                                                                              | 10 (0.7)                      | 11 (2.3)                     | 2.658 (0.894 - 7.901)        | 0.098                 | 10 (1.1)             | 13 (1.1)                        | 1.437 (0.512 - 4.033)            | 0.603                 |
| A-4G-G-C-T-A                                                                              | 39 (2.5)                      | 11 (2.3)                     | 0.682 (0.264 - 1.761)        | 0.474                 | 18 (2.1)             | 36 (3.2)                        | 2.211 (0.954 - 5.120)            | 0.090                 |
| A-4G-G-C-G-G                                                                              | 4 (0.2)                       | 0 (0.0)                      | 0.262 (0.013 - 5.248)        | 0.561                 | 0 (0.0)              | 5 (0.5)                         | 12.130 (0.629 - 234.000)         | 0.051                 |
| A-4G-A-T-G-G                                                                              | 26 (1.7)                      | 2 (0.4)                      | <b>0.186 (0.038 - 0.910)</b> | <b>0.033</b>          | 23 (2.7)             | 4 (0.3)                         | <b>0.192 (0.056 - 0.658)</b>     | <b>0.008</b>          |
| A-5G-G-T-T-G                                                                              | 5 (0.4)                       | 0 (0.0)                      | 0.215 (0.011 - 4.184)        | 0.306                 | 1 (0.2)              | 4 (0.4)                         | 4.421 (0.453 - 43.140)           | 0.346                 |
| A-5G-G-C-T-A                                                                              | 27 (1.8)                      | 12 (2.6)                     | 1.074 (0.413 - 2.796)        | 1.000                 | 0 (0.0)              | 39 (3.4)                        | <b>87.100 (5.005 - 1516.000)</b> | <b>&lt;0.0001</b>     |
| A-5G-A-C-T-A                                                                              | 3 (0.2)                       | 3 (0.7)                      | 2.417 (0.426 - 13.720)       | 0.367                 | 0 (0.0)              | 7 (0.6)                         | 16.540 (0.885 - 309.200)         | 0.012                 |

MetS, metabolic syndrome; 95% CI, 95% confidence interval.

<sup>a</sup> Fisher's exact test.

Supplementary Table S3. Haplotype for the *PAI-1* five and four polymorphisms in ischemic stroke patients, metabolic syndrome patients and controls by MDR

| Characteristics                                                                  | MetS<br>controls<br>(2n=1528) | MetS<br>patients<br>(2n=470) | OR (95% CI)                     | <i>P</i> <sup>a</sup> | Controls<br>(2n=850) | Stroke<br>patients<br>(2n=1148) | OR (95% CI)                       | <i>P</i> <sup>a</sup> |
|----------------------------------------------------------------------------------|-------------------------------|------------------------------|---------------------------------|-----------------------|----------------------|---------------------------------|-----------------------------------|-----------------------|
| <b><i>PAI-1</i> -844G&gt;A/-675 4G&gt;5G/10692T&gt;C/11053T&gt;G/12068G&gt;A</b> |                               |                              |                                 |                       |                      |                                 |                                   |                       |
| G-4G-T-T-G                                                                       | 36 (2.4)                      | 13 (2.7)                     | 1.000 (reference)               |                       | 29 (3.4)             | 20 (1.8)                        | 1.000 (reference)                 |                       |
| G-4G-T-T-A                                                                       | 18 (1.2)                      | 7 (1.5)                      | 1.077 (0.366 - 3.169)           | 1.000                 | 10 (1.1)             | 16 (1.4)                        | 2.320 (0.876 - 6.146)             | 0.097                 |
| G-4G-T-G-G                                                                       | 174 (11.4)                    | 66 (14.0)                    | 1.050 (0.524 - 2.104)           | 1.000                 | 87 (10.2)            | 155 (13.5)                      | <b>2.583 (1.379 - 4.838)</b>      | <b>0.004</b>          |
| G-4G-T-G-A                                                                       | 13 (0.8)                      | 0 (0.0)                      | 0.100 (0.006 - 1.805)           | 0.053                 | 3 (0.4)              | 12 (1.0)                        | <b>5.800 (1.448 - 23.240)</b>     | <b>0.016</b>          |
| G-4G-C-T-G                                                                       | 17 (1.1)                      | 3 (0.6)                      | 0.489 (0.123 - 1.946)           | 0.364                 | 11 (1.3)             | 8 (0.7)                         | 1.055 (0.360 - 3.088)             | 1.000                 |
| G-4G-C-T-A                                                                       | 131 (8.6)                     | 33 (7.0)                     | 0.698 (0.333 - 1.463)           | 0.331                 | 77 (9.0)             | 85 (7.4)                        | 1.601 (0.837 - 3.060)             | 0.192                 |
| G-4G-C-G-G                                                                       | 5 (0.3)                       | 3 (0.6)                      | 1.662 (0.347 - 7.954)           | 0.674                 | 2 (0.2)              | 5 (0.4)                         | 3.625 (0.639 - 20.580)            | 0.223                 |
| G-5G-T-T-G                                                                       | 31 (2.0)                      | 10 (2.2)                     | 0.893 (0.344 - 2.320)           | 1.000                 | 21 (2.4)             | 21 (1.8)                        | 1.450 (0.632 - 3.329)             | 0.406                 |
| G-5G-T-T-A                                                                       | 36 (2.4)                      | 21 (4.4)                     | 1.615 (0.703 - 3.712)           | 0.300                 | 22 (2.5)             | 34 (2.9)                        | 2.241 (1.025 - 4.901)             | 0.051                 |
| G-5G-T-G-G                                                                       | 60 (3.9)                      | 11 (2.4)                     | 0.508 (0.206 - 1.253)           | 0.166                 | 35 (4.2)             | 35 (3.0)                        | 1.450 (0.693 - 3.032)             | 0.355                 |
| G-5G-T-G-A                                                                       | 8 (0.5)                       | 1 (0.3)                      | 0.346 (0.039 - 3.044)           | 0.431                 | 5 (0.5)              | 5 (0.4)                         | 1.450 (0.371 - 5.675)             | 0.729                 |
| G-5G-C-T-G                                                                       | 93 (6.1)                      | 28 (5.9)                     | 0.834 (0.389 - 1.787)           | 0.694                 | 51 (6.0)             | 70 (6.1)                        | 1.990 (1.014 - 3.907)             | 0.062                 |
| G-5G-C-T-A                                                                       | 298 (19.5)                    | 79 (16.7)                    | 0.734 (0.372 - 1.451)           | 0.361                 | 158 (18.6)           | 217 (18.9)                      | <b>1.991 (1.087 - 3.649)</b>      | <b>0.032</b>          |
| G-5G-C-G-A                                                                       | 8 (0.5)                       | 1 (0.2)                      | 0.346 (0.039 - 3.044)           | 0.431                 | 3 (0.4)              | 9 (0.8)                         | 4.350 (1.045 - 18.100)            | 0.052                 |
| A-4G-T-T-G                                                                       | 31 (2.0)                      | 16 (3.5)                     | 1.429 (0.596 - 3.431)           | 0.507                 | 27 (3.1)             | 20 (1.8)                        | 1.074 (0.477 - 2.419)             | 1.000                 |
| A-4G-T-T-A                                                                       | 16 (1.0)                      | 3 (0.6)                      | 0.519 (0.130 - 2.078)           | 0.526                 | 5 (0.6)              | 12 (1.1)                        | <b>3.480 (1.060 - 11.430)</b>     | <b>0.049</b>          |
| A-4G-T-G-G                                                                       | 436 (28.5)                    | 127 (26.9)                   | 0.807 (0.415 - 1.568)           | 0.594                 | 265 (31.2)           | 295 (25.7)                      | 1.614 (0.892 - 2.922)             | 0.136                 |
| A-4G-T-G-A                                                                       | 16 (1.0)                      | 11 (2.3)                     | 1.904 (0.703 - 5.155)           | 0.302                 | 12 (1.4)             | 13 (1.1)                        | 1.571 (0.596 - 4.143)             | 0.460                 |
| A-4G-C-T-G                                                                       | 8 (0.5)                       | 2 (0.5)                      | 0.692 (0.130 - 3.695)           | 1.000                 | 5 (0.6)              | 6 (0.5)                         | 1.740 (0.466 - 6.493)             | 0.507                 |
| A-4G-C-T-A                                                                       | 38 (2.5)                      | 10 (2.2)                     | 0.729 (0.284 - 1.870)           | 0.634                 | 17 (2.1)             | 35 (3.1)                        | <b>2.985 (1.324 - 6.729)</b>      | <b>0.010</b>          |
| A-4G-C-G-G                                                                       | 4 (0.3)                       | 0 (0.0)                      | 0.300 (0.015 - 5.965)           | 0.561                 | 0 (0.0)              | 5 (0.4)                         | <b>15.830 (0.828 - 302.500)</b>   | <b>0.017</b>          |
| A-5G-T-T-G                                                                       | 6 (0.4)                       | 0 (0.0)                      | 0.208 (0.011 - 3.950)           | 0.317                 | 1 (0.2)              | 4 (0.4)                         | 5.800 (0.602 - 55.840)            | 0.159                 |
| A-5G-T-G-G                                                                       | 7 (0.5)                       | 4 (0.9)                      | 1.582 (0.397 - 6.308)           | 0.712                 | 1 (0.2)              | 12 (1.0)                        | <b>17.400 (2.092 - 144.800)</b>   | <b>0.001</b>          |
| A-5G-C-T-A                                                                       | 28 (1.9)                      | 16 (3.5)                     | 1.582 (0.654 - 3.827)           | 0.372                 | 0 (0.0)              | 43 (3.8)                        | <b>125.200 (7.280 - 2153.000)</b> | <b>&lt;0.0001</b>     |
| <b><i>PAI-1</i> -844G&gt;A/-675 4G&gt;5G/43G&gt;A/10692T&gt;C</b>                |                               |                              |                                 |                       |                      |                                 |                                   |                       |
| G-4G-G-T                                                                         | 222 (14.5)                    | 84 (17.9)                    | 1.000 (reference)               |                       | 112 (13.2)           | 198 (17.2)                      | 1.000 (reference)                 |                       |
| G-4G-G-C                                                                         | 143 (9.4)                     | 36 (7.7)                     | 0.665 (0.427 - 1.037)           | 0.081                 | 82 (9.6)             | 94 (8.2)                        | <b>0.648 (0.445 - 0.945)</b>      | <b>0.027</b>          |
| G-4G-A-T                                                                         | 16 (1.1)                      | 2 (0.5)                      | 0.330 (0.074 - 1.468)           | 0.172                 | 15 (1.7)             | 4 (0.3)                         | <b>0.151 (0.049 - 0.466)</b>      | <b>0.0003</b>         |
| G-4G-A-C                                                                         | 14 (0.9)                      | 3 (0.6)                      | 0.566 (0.159 - 2.021)           | 0.575                 | 11 (1.3)             | 6 (0.5)                         | <b>0.309 (0.111 - 0.857)</b>      | <b>0.022</b>          |
| G-5G-G-T                                                                         | 131 (8.6)                     | 37 (7.8)                     | 0.747 (0.479 - 1.163)           | 0.226                 | 77 (9.1)             | 86 (7.5)                        | <b>0.632 (0.430 - 0.929)</b>      | <b>0.023</b>          |
| G-5G-G-C                                                                         | 344 (22.5)                    | 90 (19.2)                    | <b>0.691 (0.491 - 0.973)</b>    | <b>0.035</b>          | 188 (22.1)           | 249 (21.7)                      | 0.749 (0.555 - 1.011)             | 0.059                 |
| G-5G-A-T                                                                         | 11 (0.7)                      | 8 (1.7)                      | 1.922 (0.747 - 4.945)           | 0.192                 | 6 (0.7)              | 12 (1.0)                        | 1.131 (0.413 - 3.098)             | 1.000                 |
| G-5G-A-C                                                                         | 51 (3.3)                      | 17 (3.6)                     | 0.881 (0.482 - 1.611)           | 0.764                 | 24 (2.9)             | 45 (3.9)                        | 1.061 (0.614 - 1.833)             | 0.890                 |
| A-4G-G-T                                                                         | 461 (30.2)                    | 152 (32.4)                   | 0.871 (0.639 - 1.189)           | 0.423                 | 281 (33.1)           | 331 (28.8)                      | <b>0.666 (0.503 - 0.883)</b>      | <b>0.005</b>          |
| A-4G-G-C                                                                         | 48 (3.2)                      | 16 (3.4)                     | 0.881 (0.474 - 1.636)           | 0.758                 | 23 (2.7)             | 44 (3.9)                        | 1.082 (0.621 - 1.885)             | 0.888                 |
| A-4G-A-T                                                                         | 36 (2.4)                      | 1 (0.3)                      | <b>0.073 (0.010 - 0.544)</b>    | <b>0.0004</b>         | 28 (3.3)             | 7 (0.6)                         | <b>0.141 (0.060 - 0.334)</b>      | <b>&lt;0.0001</b>     |
| A-4G-A-C                                                                         | 4 (0.2)                       | 0 (0.0)                      | 0.293 (0.016 - 5.497)           | 0.578                 | 0 (0.0)              | 3 (0.3)                         | 3.967 (0.203 - 77.560)            | 0.555                 |
| A-5G-G-T                                                                         | 9 (0.6)                       | 5 (1.0)                      | 1.468 (0.478 - 4.509)           | 0.545                 | 3 (0.3)              | 17 (1.5)                        | 3.205 (0.919 - 11.180)            | 0.087                 |
| A-5G-G-C                                                                         | 33 (2.2)                      | 14 (3.0)                     | 1.121 (0.572 - 2.200)           | 0.729                 | 0 (0.0)              | 40 (3.5)                        | <b>45.910 (2.794 - 754.300)</b>   | <b>&lt;0.0001</b>     |
| A-5G-A-T                                                                         | 4 (0.3)                       | 0 (0.0)                      | 0.293 (0.016 - 5.497)           | 0.578                 | 0 (0.0)              | 2 (0.1)                         | 2.834 (0.135 - 59.590)            | 0.538                 |
| A-5G-A-C                                                                         | 0 (0.0)                       | 5 (1.0)                      | <b>28.960 (1.583 - 529.900)</b> | <b>0.002</b>          | 0 (0.0)              | 9 (0.8)                         | <b>10.770 (0.621 - 186.900)</b>   | <b>0.030</b>          |

MetS, metabolic syndrome; 95% CI, 95% confidence interval.

<sup>a</sup> Fisher's exact test.

Supplementary Table S4. Haplotype for the *PAI-1* three and two polymorphisms in ischemic stroke patients, metabolic syndrome patients and controls by MDR

| Characteristics                                          | MetS<br>controls<br>(2n=1528) | MetS<br>patients<br>(2n=470) | OR (95% CI)                  | <i>P</i> <sup>a</sup> | Controls<br>(2n=850) | Stroke<br>patients<br>(2n=1148) | OR (95% CI)                      | <i>P</i> <sup>a</sup> |
|----------------------------------------------------------|-------------------------------|------------------------------|------------------------------|-----------------------|----------------------|---------------------------------|----------------------------------|-----------------------|
| <b><i>PAI-1</i> -844G&gt;A/-675 4G&gt;5G/10692T&gt;C</b> |                               |                              |                              |                       |                      |                                 |                                  |                       |
| G-4G-T                                                   | 238 (15.6)                    | 86 (18.3)                    | 1.000 (reference)            |                       | 127 (15.0)           | 201 (17.6)                      | 1.000 (reference)                |                       |
| G-4G-C                                                   | 157 (10.3)                    | 39 (8.3)                     | 0.688 (0.448 - 1.056)        | 0.091                 | 92 (10.9)            | 101 (8.8)                       | 0.694 (0.484 - 0.994)            | 0.054                 |
| G-5G-T                                                   | 140 (9.2)                     | 44 (9.4)                     | 0.870 (0.572 - 1.323)        | 0.528                 | 83 (9.8)             | 98 (8.6)                        | 0.746 (0.517 - 1.077)            | 0.133                 |
| G-5G-C                                                   | 396 (25.9)                    | 107 (22.8)                   | 0.748 (0.540 - 1.036)        | 0.092                 | 212 (25.0)           | 294 (25.6)                      | 0.876 (0.660 - 1.164)            | 0.387                 |
| A-4G-T                                                   | 497 (32.6)                    | 154 (32.8)                   | 0.858 (0.632 - 1.164)        | 0.344                 | 309 (36.4)           | 339 (29.5)                      | <b>0.693 (0.529 - 0.909)</b>     | <b>0.008</b>          |
| A-4G-C                                                   | 52 (3.4)                      | 16 (3.3)                     | 0.852 (0.462 - 1.571)        | 0.652                 | 23 (2.8)             | 47 (4.1)                        | 1.291 (0.748 - 2.229)            | 0.416                 |
| A-5G-T                                                   | 14 (0.9)                      | 4 (0.9)                      | 0.791 (0.253 - 2.469)        | 0.790                 | 3 (0.3)              | 19 (1.6)                        | <b>4.002 (1.160 - 13.800)</b>    | <b>0.021</b>          |
| A-5G-C                                                   | 32 (2.1)                      | 19 (4.0)                     | 1.643 (0.885 - 3.052)        | 0.131                 | 0 (0.0)              | 49 (4.3)                        | <b>62.640 (3.827 - 1025.000)</b> | <b>&lt;0.0001</b>     |
| <b><i>PAI-1</i> -844G&gt;A/-675 4G&gt;5G</b>             |                               |                              |                              |                       |                      |                                 |                                  |                       |
| G-4G                                                     | 398 (26.0)                    | 125 (26.7)                   | 1.000 (reference)            |                       | 220 (25.9)           | 304 (26.5)                      | 1.000 (reference)                |                       |
| G-5G                                                     | 534 (35.0)                    | 152 (32.3)                   | 0.906 (0.692 - 1.187)        | 0.490                 | 295 (34.7)           | 390 (34.0)                      | 0.957 (0.760 - 1.204)            | 0.725                 |
| A-4G                                                     | 547 (35.8)                    | 170 (36.1)                   | 0.955 (0.732 - 1.246)        | 0.734                 | 332 (39.1)           | 384 (33.5)                      | 0.837 (0.667 - 1.051)            | 0.133                 |
| A-5G                                                     | 49 (3.2)                      | 23 (5.0)                     | <b>1.884 (1.141 - 3.111)</b> | <b>0.018</b>          | 3 (0.3)              | 70 (6.1)                        | <b>16.890 (5.247 - 54.340)</b>   | <b>&lt;0.0001</b>     |

MetS, metabolic syndrome; 95% CI, 95% confidence interval.

<sup>a</sup> Fisher's exact test.

Supplementary Table S5. Combined genotype analysis for the *PAI-1* polymorphisms in ischemic metabolic syndrome patients, stroke patients and controls

| Genotype                                     | MetS<br>controls<br>(n=764) | MetS<br>patients<br>(n=235) | OR (95% CI)                     | <i>P</i>     | Stroke<br>controls<br>(n=425) | Stroke<br>patients<br>(n=574) | AOR (95% CI) <sup>a</sup>      | <i>P</i>     |
|----------------------------------------------|-----------------------------|-----------------------------|---------------------------------|--------------|-------------------------------|-------------------------------|--------------------------------|--------------|
| <b><i>PAI-1</i> -844G&gt;A/-675 4G&gt;5G</b> |                             |                             |                                 |              |                               |                               |                                |              |
| GG-4G4G                                      | 63 (8.2)                    | 14 (6.0)                    | 1.000 (reference)               |              | 38 (8.9)                      | 39 (6.8)                      | 1.000 (reference)              |              |
| GG-4G5G                                      | 121 (15.8)                  | 34 (14.5)                   | 1.265 (0.632 - 2.528)           | 0.507        | 71 (16.7)                     | 84 (14.6)                     | 1.124 (0.625 - 2.024)          | 0.696        |
| GG-5G5G                                      | 104 (13.6)                  | 27 (11.5)                   | 1.168 (0.570 - 2.394)           | 0.671        | 53 (12.5)                     | 78 (13.6)                     | 1.328 (0.715 - 2.467)          | 0.370        |
| GA-4G4G                                      | 138 (18.1)                  | 57 (24.3)                   | 1.859 (0.964 - 3.583)           | 0.064        | 72 (16.9)                     | 123 (21.4)                    | 1.439 (0.815 - 2.540)          | 0.209        |
| GA-4G5G                                      | 206 (27.0)                  | 62 (26.4)                   | 1.354 (0.711 - 2.581)           | 0.357        | 117 (27.5)                    | 151 (26.3)                    | 1.100 (0.646 - 1.872)          | 0.727        |
| GA-5G5G                                      | 12 (1.6)                    | 8 (3.4)                     | <b>3.000 (1.034 - 8.709)</b>    | <b>0.043</b> | 2 (0.5)                       | 18 (3.1)                      | <b>8.389 (1.671 - 42.110)</b>  | <b>0.010</b> |
| AA-4G4G                                      | 102 (13.4)                  | 26 (11.1)                   | 1.147 (0.557 - 2.361)           | 0.709        | 72 (16.9)                     | 56 (9.8)                      | 0.709 (0.377 - 1.334)          | 0.287        |
| AA-4G5G                                      | 12 (1.6)                    | 5 (2.1)                     | 1.875 (0.569 - 6.183)           | 0.302        | 0 (0.0)                       | 17 (3.0)                      | N/A                            | N/A          |
| AA-5G5G                                      | 6 (0.8)                     | 2 (0.9)                     | 1.500 (0.274 - 8.227)           | 0.641        | 0 (0.0)                       | 8 (1.4)                       | N/A                            | N/A          |
| <b><i>PAI-1</i> -844G&gt;A/43G&gt;A</b>      |                             |                             |                                 |              |                               |                               |                                |              |
| GG-GG                                        | 231 (30.2)                  | 56 (23.8)                   | 1.000 (reference)               |              | 128 (30.1)                    | 159 (27.7)                    | 1.000 (reference)              |              |
| GG-GA                                        | 52 (6.8)                    | 18 (7.7)                    | 1.428 (0.776 - 2.629)           | 0.253        | 30 (7.1)                      | 40 (7.0)                      | 1.216 (0.693 - 2.135)          | 0.496        |
| GG-AA                                        | 5 (0.7)                     | 1 (0.4)                     | 0.825 (0.095 - 7.202)           | 0.862        | 4 (0.9)                       | 2 (0.3)                       | 0.326 (0.054 - 1.962)          | 0.221        |
| GA-GG                                        | 309 (40.4)                  | 114 (48.5)                  | <b>1.522 (1.059 - 2.187)</b>    | <b>0.023</b> | 162 (38.1)                    | 261 (45.5)                    | 1.203 (0.877 - 1.652)          | 0.252        |
| GA-GA                                        | 42 (5.5)                    | 13 (5.5)                    | 1.277 (0.642 - 2.538)           | 0.486        | 26 (6.1)                      | 29 (5.1)                      | 0.802 (0.435 - 1.480)          | 0.480        |
| GA-AA                                        | 5 (0.7)                     | 0 (0.0)                     | 0.000 (0.000 - 0.000)           | 0.995        | 3 (0.7)                       | 2 (0.3)                       | 0.720 (0.111 - 4.658)          | 0.730        |
| AA-GG                                        | 99 (13.0)                   | 30 (12.8)                   | 1.250 (0.757 - 2.065)           | 0.384        | 58 (13.6)                     | 71 (12.4)                     | 1.012 (0.653 - 1.569)          | 0.958        |
| AA-GA                                        | 20 (2.6)                    | 3 (1.3)                     | 0.619 (0.178 - 2.156)           | 0.451        | 14 (3.3)                      | 9 (1.6)                       | 0.642 (0.256 - 1.608)          | 0.344        |
| AA-AA                                        | 1 (0.1)                     | 0 (0.0)                     | N/A                             | N/A          | 0 (0.0)                       | 1 (0.2)                       | N/A                            | N/A          |
| <b><i>PAI-1</i> -844G&gt;A/9785G&gt;A</b>    |                             |                             |                                 |              |                               |                               |                                |              |
| GG-GG                                        | 254 (33.2)                  | 69 (29.4)                   | 1.000 (reference)               |              | 147 (34.6)                    | 176 (30.7)                    | 1.000 (reference)              |              |
| GG-GA                                        | 32 (4.2)                    | 6 (2.6)                     | 0.690 (0.277 - 1.718)           | 0.425        | 14 (3.3)                      | 24 (4.2)                      | 1.412 (0.678 - 2.942)          | 0.357        |
| GG-AA                                        | 2 (0.3)                     | 0 (0.0)                     | 0.000 (0.000 - 0.000)           | 0.994        | 1 (0.2)                       | 1 (0.2)                       | N/A                            | N/A          |
| GA-GG                                        | 335 (43.8)                  | 120 (51.1)                  | 1.319 (0.940 - 1.849)           | 0.109        | 178 (41.9)                    | 277 (48.3)                    | 1.176 (0.869 - 1.592)          | 0.293        |
| GA-GA                                        | 21 (2.7)                    | 7 (3.0)                     | 1.227 (0.501 - 3.006)           | 0.654        | 13 (3.1)                      | 15 (2.6)                      | 0.884 (0.388 - 2.013)          | 0.768        |
| GA-AA                                        | 0 (0.0)                     | 0 (0.0)                     | N/A                             | N/A          | 0 (0.0)                       | 0 (0.0)                       | N/A                            | N/A          |
| AA-GG                                        | 119 (15.6)                  | 30 (12.8)                   | 0.928 (0.574 - 1.501)           | 0.761        | 71 (16.7)                     | 78 (13.6)                     | 0.944 (0.627 - 1.421)          | 0.782        |
| AA-GA                                        | 1 (0.1)                     | 3 (1.3)                     | <b>11.044 (1.131 - 107.839)</b> | <b>0.039</b> | 1 (0.2)                       | 3 (0.5)                       | 1.718 (0.165 - 17.924)         | 0.651        |
| AA-AA                                        | 0 (0.0)                     | 0 (0.0)                     | N/A                             | N/A          | 0 (0.0)                       | 0 (0.0)                       | N/A                            | N/A          |
| <b><i>PAI-1</i> -844G&gt;A/10692T&gt;C</b>   |                             |                             |                                 |              |                               |                               |                                |              |
| GG-TT                                        | 70 (9.2)                    | 21 (8.9)                    | 1.000 (reference)               |              | 37 (8.7)                      | 54 (9.4)                      | 1.000 (reference)              |              |
| GG-TC                                        | 112 (14.7)                  | 26 (11.1)                   | 0.774 (0.405 - 1.479)           | 0.438        | 67 (15.8)                     | 71 (12.4)                     | 0.789 (0.446 - 1.398)          | 0.417        |
| GG-CC                                        | 106 (13.9)                  | 28 (11.9)                   | 0.881 (0.464 - 1.672)           | 0.697        | 58 (13.6)                     | 76 (13.2)                     | 0.898 (0.503 - 1.604)          | 0.716        |
| GA-TT                                        | 103 (13.5)                  | 50 (21.3)                   | 1.618 (0.894 - 2.929)           | 0.112        | 64 (15.1)                     | 89 (15.5)                     | 0.802 (0.456 - 1.412)          | 0.445        |
| GA-TC                                        | 236 (30.9)                  | 68 (28.9)                   | 0.961 (0.550 - 1.677)           | 0.887        | 123 (28.9)                    | 181 (31.5)                    | 0.964 (0.585 - 1.589)          | 0.886        |
| GA-CC                                        | 17 (2.2)                    | 9 (3.8)                     | 1.765 (0.687 - 4.535)           | 0.238        | 4 (0.9)                       | 22 (3.8)                      | <b>4.035 (1.145 - 14.217)</b>  | <b>0.030</b> |
| AA-TT                                        | 79 (10.3)                   | 21 (8.9)                    | 0.886 (0.447 - 1.758)           | 0.729        | 58 (13.6)                     | 42 (7.3)                      | <b>0.455 (0.238 - 0.872)</b>   | <b>0.018</b> |
| AA-TC                                        | 38 (5.0)                    | 11 (4.7)                    | 0.965 (0.421 - 2.212)           | 0.933        | 14 (3.3)                      | 35 (6.1)                      | <b>2.659 (1.126 - 6.276)</b>   | <b>0.026</b> |
| AA-CC                                        | 3 (0.4)                     | 1 (0.4)                     | 1.111 (0.110 - 11.252)          | 0.929        | 0 (0.0)                       | 4 (0.7)                       | N/A                            | N/A          |
| <b><i>PAI-1</i> -844G&gt;A/11053T&gt;G</b>   |                             |                             |                                 |              |                               |                               |                                |              |
| GG-TT                                        | 147 (19.2)                  | 41 (17.4)                   | 1.000 (reference)               |              | 83 (19.5)                     | 105 (18.3)                    | 1.000 (reference)              |              |
| GG-TG                                        | 103 (13.5)                  | 27 (11.5)                   | 0.940 (0.544 - 1.624)           | 0.824        | 66 (15.5)                     | 64 (11.1)                     | 0.791 (0.491 - 1.273)          | 0.334        |
| GG-GG                                        | 38 (5.0)                    | 7 (3.0)                     | 0.661 (0.275 - 1.588)           | 0.354        | 13 (3.1)                      | 32 (5.6)                      | 1.896 (0.896 - 4.011)          | 0.094        |
| GA-TT                                        | 50 (6.5)                    | 22 (9.4)                    | 1.578 (0.858 - 2.901)           | 0.143        | 24 (5.6)                      | 48 (8.4)                      | 1.284 (0.702 - 2.350)          | 0.417        |
| GA-TG                                        | 234 (30.6)                  | 71 (30.2)                   | 1.088 (0.703 - 1.683)           | 0.705        | 128 (30.1)                    | 177 (30.8)                    | 1.059 (0.721 - 1.554)          | 0.772        |
| GA-GG                                        | 72 (9.4)                    | 34 (14.5)                   | 1.693 (0.992 - 2.891)           | 0.054        | 39 (9.2)                      | 67 (11.7)                     | 1.123 (0.662 - 1.903)          | 0.667        |
| AA-TT                                        | 9 (1.2)                     | 5 (2.1)                     | 1.992 (0.633 - 6.270)           | 0.239        | 1 (0.2)                       | 13 (2.3)                      | <b>10.968 (1.351 - 89.059)</b> | <b>0.025</b> |
| AA-TG                                        | 41 (5.4)                    | 8 (3.4)                     | 0.700 (0.304 - 1.609)           | 0.401        | 23 (5.4)                      | 26 (4.5)                      | 1.000 (0.509 - 1.964)          | 0.999        |
| AA-GG                                        | 70 (9.2)                    | 20 (8.5)                    | 1.024 (0.559 - 1.877)           | 0.938        | 48 (11.3)                     | 42 (7.3)                      | 0.675 (0.393 - 1.159)          | 0.154        |

MetS, metabolic syndrome; 95% CI, 95% confidence interval; AOR, adjusted odds ratio; N/A, not applicable.

<sup>a</sup> Adjusted by age, sex, hypertension, diabetes mellitus, hyperlipidemia, and smoking.

Supplementary Table S6. Combined genotype analysis for the *PAI-1* polymorphisms in ischemic metabolic syndrome patients, stroke patients and controls

| Genotype                                      | MetS<br>controls<br>(n=764) | MetS<br>patients<br>(n=235) | OR (95% CI)                  | <i>P</i>     | Stroke<br>controls<br>(n=425) | Stroke<br>patients<br>(n=574) | AOR (95% CI) <sup>a</sup>    | <i>P</i>      |
|-----------------------------------------------|-----------------------------|-----------------------------|------------------------------|--------------|-------------------------------|-------------------------------|------------------------------|---------------|
| <b><i>PAI-1</i> -844G&gt;A/12068G&gt;A</b>    |                             |                             |                              |              |                               |                               |                              |               |
| GG-GG                                         | 70 (9.2)                    | 19 (8.1)                    | 1.000 (reference)            |              | 37 (8.7)                      | 52 (9.1)                      | 1.000 (reference)            |               |
| GG-GA                                         | 135 (17.7)                  | 35 (14.9)                   | 0.955 (0.509 - 1.791)        | 0.886        | 82 (19.3)                     | 88 (15.3)                     | 0.895 (0.506 - 1.583)        | 0.703         |
| GG-AA                                         | 83 (10.9)                   | 21 (8.9)                    | 0.932 (0.464 - 1.872)        | 0.843        | 43 (10.1)                     | 61 (10.6)                     | 1.069 (0.582 - 1.963)        | 0.831         |
| GA-GG                                         | 117 (15.3)                  | 49 (20.9)                   | 1.543 (0.841 - 2.831)        | 0.161        | 72 (16.9)                     | 94 (16.4)                     | 0.773 (0.440 - 1.356)        | 0.369         |
| GA-GA                                         | 213 (27.9)                  | 62 (26.4)                   | 1.072 (0.600 - 1.916)        | 0.814        | 110 (25.9)                    | 165 (28.7)                    | 1.064 (0.634 - 1.785)        | 0.814         |
| GA-AA                                         | 26 (3.4)                    | 16 (6.8)                    | <b>2.267 (1.016 - 5.061)</b> | <b>0.046</b> | 9 (2.1)                       | 33 (5.7)                      | 2.316 (0.909 - 5.900)        | 0.079         |
| AA-GG                                         | 78 (10.2)                   | 20 (8.5)                    | 0.945 (0.466 - 1.914)        | 0.874        | 54 (12.7)                     | 44 (7.7)                      | 0.540 (0.279 - 1.049)        | 0.069         |
| AA-GA                                         | 35 (4.6)                    | 13 (5.5)                    | 1.368 (0.606 - 3.088)        | 0.450        | 18 (4.2)                      | 30 (5.2)                      | 1.498 (0.665 - 3.377)        | 0.329         |
| AA-AA                                         | 7 (0.9)                     | 0 (0.0)                     | N/A                          | N/A          | 0 (0.0)                       | 7 (1.2)                       | N/A                          | N/A           |
| <b><i>PAI-1</i> -675 4G&gt;5G/43G&gt;A</b>    |                             |                             |                              |              |                               |                               |                              |               |
| 4G4G-GG                                       | 258 (33.8)                  | 94 (40.0)                   | 1.000 (reference)            |              | 144 (33.9)                    | 208 (36.2)                    | 1.000 (reference)            |               |
| 4G4G-GA                                       | 44 (5.8)                    | 2 (0.9)                     | <b>0.125 (0.030 - 0.525)</b> | <b>0.005</b> | 37 (8.7)                      | 9 (1.6)                       | <b>0.194 (0.088 - 0.428)</b> | <b>0.0001</b> |
| 4G4G-AA                                       | 1 (0.1)                     | 1 (0.4)                     | 2.745 (0.170 - 44.326)       | 0.477        | 1 (0.2)                       | 1 (0.2)                       | 0.400 (0.024 - 6.709)        | 0.524         |
| 4G5G-GG                                       | 288 (37.7)                  | 79 (33.6)                   | 0.753 (0.534 - 1.061)        | 0.105        | 162 (38.1)                    | 205 (35.7)                    | 0.867 (0.636 - 1.180)        | 0.364         |
| 4G5G-GA                                       | 44 (5.8)                    | 22 (9.4)                    | 1.372 (0.781 - 2.411)        | 0.271        | 22 (5.2)                      | 44 (7.7)                      | 1.312 (0.725 - 2.374)        | 0.371         |
| 4G5G-AA                                       | 7 (0.9)                     | 0 (0.0)                     | N/A                          | N/A          | 4 (0.9)                       | 3 (0.5)                       | 0.709 (0.137 - 3.678)        | 0.683         |
| 5G5G-GG                                       | 93 (12.2)                   | 27 (11.5)                   | 0.797 (0.489 - 1.300)        | 0.363        | 42 (9.9)                      | 78 (13.6)                     | 1.244 (0.786 - 1.968)        | 0.351         |
| 5G5G-GA                                       | 26 (3.4)                    | 10 (4.3)                    | 1.056 (0.490 - 2.272)        | 0.890        | 11 (2.6)                      | 25 (4.4)                      | 2.071 (0.937 - 4.578)        | 0.072         |
| 5G5G-AA                                       | 3 (0.4)                     | 0 (0.0)                     | N/A                          | N/A          | 2 (0.5)                       | 1 (0.2)                       | 0.366 (0.030 - 4.445)        | 0.430         |
| <b><i>PAI-1</i> -675 4G&gt;5G/9785G&gt;A</b>  |                             |                             |                              |              |                               |                               |                              |               |
| 4G4G-GG                                       | 289 (37.8)                  | 91 (38.7)                   | 1.000 (reference)            |              | 171 (40.2)                    | 209 (36.4)                    | 1.000 (reference)            |               |
| 4G4G-GA                                       | 14 (1.8)                    | 6 (2.6)                     | 1.361 (0.508 - 3.645)        | 0.540        | 11 (2.6)                      | 9 (1.6)                       | 0.530 (0.198 - 1.421)        | 0.207         |
| 4G4G-AA                                       | 0 (0.0)                     | 0 (0.0)                     | N/A                          | N/A          | 0 (0.0)                       | 0 (0.0)                       | N/A                          | N/A           |
| 4G5G-GG                                       | 318 (41.6)                  | 97 (41.3)                   | 0.969 (0.698 - 1.344)        | 0.849        | 178 (41.9)                    | 237 (41.3)                    | 1.056 (0.787 - 1.417)        | 0.716         |
| 4G5G-GA                                       | 21 (2.7)                    | 4 (1.7)                     | 0.605 (0.202 - 1.808)        | 0.368        | 10 (2.4)                      | 15 (2.6)                      | 1.148 (0.485 - 2.717)        | 0.754         |
| 4G5G-AA                                       | 0 (0.0)                     | 0 (0.0)                     | N/A                          | N/A          | 0 (0.0)                       | 0 (0.0)                       | N/A                          | N/A           |
| 5G5G-GG                                       | 101 (13.2)                  | 31 (13.2)                   | 0.975 (0.612 - 1.554)        | 0.914        | 47 (11.1)                     | 85 (14.8)                     | 1.543 (0.999 - 2.384)        | 0.051         |
| 5G5G-GA                                       | 19 (2.5)                    | 6 (2.6)                     | 1.003 (0.389 - 2.587)        | 0.995        | 7 (1.6)                       | 18 (3.1)                      | 2.221 (0.863 - 5.721)        | 0.098         |
| 5G5G-AA                                       | 2 (0.3)                     | 0 (0.0)                     | N/A                          | N/A          | 1 (0.2)                       | 1 (0.2)                       | N/A                          | N/A           |
| <b><i>PAI-1</i> -675 4G&gt;5G/10692T&gt;C</b> |                             |                             |                              |              |                               |                               |                              |               |
| 4G4G-TT                                       | 174 (22.8)                  | 64 (27.2)                   | 1.000 (reference)            |              | 109 (25.6)                    | 129 (22.5)                    | 1.000 (reference)            |               |
| 4G4G-TC                                       | 109 (14.3)                  | 29 (12.3)                   | 0.723 (0.439 - 1.192)        | 0.204        | 63 (14.8)                     | 75 (13.1)                     | 1.200 (0.762 - 1.888)        | 0.431         |
| 4G4G-CC                                       | 20 (2.6)                    | 4 (1.7)                     | 0.544 (0.179 - 1.652)        | 0.283        | 10 (2.4)                      | 14 (2.4)                      | 1.587 (0.627 - 4.018)        | 0.330         |
| 4G5G-TT                                       | 64 (8.4)                    | 23 (9.8)                    | 0.977 (0.560 - 1.704)        | 0.935        | 42 (9.9)                      | 45 (7.8)                      | 0.922 (0.546 - 1.558)        | 0.763         |
| 4G5G-TC                                       | 234 (30.6)                  | 65 (27.7)                   | 0.755 (0.508 - 1.123)        | 0.166        | 123 (28.9)                    | 176 (30.7)                    | 1.268 (0.882 - 1.824)        | 0.200         |
| 4G5G-CC                                       | 41 (5.4)                    | 13 (5.5)                    | 0.862 (0.434 - 1.713)        | 0.672        | 23 (5.4)                      | 31 (5.4)                      | 1.028 (0.536 - 1.974)        | 0.933         |
| 5G5G-TT                                       | 14 (1.8)                    | 5 (2.1)                     | 0.971 (0.336 - 2.804)        | 0.957        | 8 (1.9)                       | 11 (1.9)                      | 1.127 (0.397 - 3.200)        | 0.823         |
| 5G5G-TC                                       | 43 (5.6)                    | 11 (4.7)                    | 0.696 (0.338 - 1.431)        | 0.324        | 18 (4.2)                      | 36 (6.3)                      | <b>1.983 (1.011 - 3.891)</b> | <b>0.047</b>  |
| 5G5G-CC                                       | 65 (8.5)                    | 21 (8.9)                    | 0.878 (0.497 - 1.552)        | 0.655        | 29 (6.8)                      | 57 (9.9)                      | <b>1.803 (1.030 - 3.154)</b> | <b>0.039</b>  |
| <b><i>PAI-1</i> -675 4G&gt;5G/11053T&gt;G</b> |                             |                             |                              |              |                               |                               |                              |               |
| 4G4G-TT                                       | 42 (5.5)                    | 14 (6.0)                    | 1.000 (reference)            |              | 24 (5.6)                      | 32 (5.6)                      | 1.000 (reference)            |               |
| 4G4G-TG                                       | 123 (16.1)                  | 31 (13.2)                   | 0.756 (0.367 - 1.556)        | 0.448        | 80 (18.8)                     | 74 (12.9)                     | 0.758 (0.388 - 1.479)        | 0.416         |
| 4G4G-GG                                       | 138 (18.1)                  | 52 (22.1)                   | 1.130 (0.571 - 2.240)        | 0.725        | 78 (18.4)                     | 112 (19.5)                    | 0.944 (0.494 - 1.807)        | 0.863         |
| 4G5G-TT                                       | 74 (9.7)                    | 25 (10.6)                   | 1.014 (0.476 - 2.158)        | 0.972        | 44 (10.4)                     | 55 (9.6)                      | 0.884 (0.438 - 1.784)        | 0.730         |
| 4G5G-TG                                       | 227 (29.7)                  | 67 (28.5)                   | 0.886 (0.456 - 1.719)        | 0.719        | 124 (29.2)                    | 170 (29.6)                    | 0.960 (0.526 - 1.754)        | 0.895         |
| 4G5G-GG                                       | 38 (5.0)                    | 9 (3.8)                     | 0.711 (0.276 - 1.829)        | 0.479        | 20 (4.7)                      | 27 (4.7)                      | 1.047 (0.445 - 2.465)        | 0.917         |
| 5G5G-TT                                       | 90 (11.8)                   | 29 (12.3)                   | 0.967 (0.463 - 2.017)        | 0.928        | 40 (9.4)                      | 79 (13.8)                     | 1.552 (0.754 - 3.194)        | 0.233         |
| 5G5G-TG                                       | 28 (3.7)                    | 8 (3.4)                     | 0.857 (0.318 - 2.311)        | 0.761        | 13 (3.1)                      | 23 (4.0)                      | 1.267 (0.483 - 3.326)        | 0.630         |
| 5G5G-GG                                       | 4 (0.5)                     | 0 (0.0)                     | N/A                          | N/A          | 2 (0.5)                       | 2 (0.3)                       | 0.552 (0.060 - 5.083)        | 0.600         |

MetS, metabolic syndrome; 95% CI, 95% confidence interval; AOR, adjusted odds ratio; N/A, not applicable.

<sup>a</sup> Adjusted by age, sex, hypertension, diabetes mellitus, hyperlipidemia, and smoking.

Supplementary Table S7. Combined genotype analysis for the *PAI-1* polymorphisms in ischemic metabolic syndrome patients, stroke patients and controls

| Genotype                                      | MetS<br>controls<br>(n=764) | MetS<br>patients<br>(n=235) | OR (95% CI)                  | <i>P</i>     | Stroke<br>controls<br>(n=425) | Stroke<br>patients<br>(n=574) | AOR (95% CI) <sup>a</sup>    | <i>P</i>      |
|-----------------------------------------------|-----------------------------|-----------------------------|------------------------------|--------------|-------------------------------|-------------------------------|------------------------------|---------------|
| <b><i>PAI-1</i> -675 4G&gt;5G/12068G&gt;A</b> |                             |                             |                              |              |                               |                               |                              |               |
| 4G4G-GG                                       | 162 (21.2)                  | 61 (26.0)                   | 1.000 (reference)            |              | 101 (23.8)                    | 122 (21.3)                    | 1.000 (reference)            |               |
| 4G4G-GA                                       | 119 (15.6)                  | 30 (12.8)                   | 0.670 (0.407 - 1.101)        | 0.114        | 71 (16.7)                     | 78 (13.6)                     | 1.107 (0.707 - 1.733)        | 0.657         |
| 4G4G-AA                                       | 22 (2.9)                    | 6 (2.6)                     | 0.724 (0.280 - 1.872)        | 0.506        | 10 (2.4)                      | 18 (3.1)                      | 1.690 (0.699 - 4.084)        | 0.244         |
| 4G5G-GG                                       | 86 (11.3)                   | 21 (8.9)                    | 0.649 (0.370 - 1.136)        | 0.130        | 56 (13.2)                     | 51 (8.9)                      | 0.729 (0.445 - 1.194)        | 0.210         |
| 4G5G-GA                                       | 206 (27.0)                  | 63 (26.8)                   | 0.812 (0.540 - 1.221)        | 0.317        | 110 (25.9)                    | 159 (27.7)                    | 1.343 (0.913 - 1.975)        | 0.134         |
| 4G5G-AA                                       | 47 (6.2)                    | 17 (7.2)                    | 0.961 (0.513 - 1.800)        | 0.900        | 22 (5.2)                      | 42 (7.3)                      | 1.640 (0.880 - 3.057)        | 0.120         |
| 5G5G-GG                                       | 17 (2.2)                    | 6 (2.6)                     | 0.937 (0.353 - 2.488)        | 0.897        | 6 (1.4)                       | 17 (3.0)                      | 2.430 (0.852 - 6.931)        | 0.097         |
| 5G5G-GA                                       | 58 (7.6)                    | 17 (7.2)                    | 0.778 (0.421 - 1.441)        | 0.425        | 29 (6.8)                      | 46 (8.0)                      | 1.637 (0.916 - 2.927)        | 0.096         |
| 5G5G-AA                                       | 47 (6.2)                    | 14 (6.0)                    | 0.791 (0.407 - 1.539)        | 0.490        | 20 (4.7)                      | 41 (7.1)                      | <b>1.908 (1.002 - 3.631)</b> | <b>0.049</b>  |
| <b><i>PAI-1</i> 43G&gt;A/9785G&gt;A</b>       |                             |                             |                              |              |                               |                               |                              |               |
| GG-GG                                         | 591 (77.4)                  | 185 (78.7)                  | 1.000 (reference)            |              | 325 (76.5)                    | 451 (78.6)                    | 1.000 (reference)            |               |
| GG-GA                                         | 46 (6.0)                    | 15 (6.4)                    | 1.042 (0.568 - 1.909)        | 0.895        | 22 (5.2)                      | 39 (6.8)                      | 1.177 (0.671 - 2.066)        | 0.569         |
| GG-AA                                         | 2 (0.3)                     | 0 (0.0)                     | N/A                          | N/A          | 1 (0.2)                       | 1 (0.2)                       | N/A                          | N/A           |
| GA-GG                                         | 106 (13.9)                  | 33 (14.0)                   | 0.995 (0.651 - 1.520)        | 0.980        | 64 (15.1)                     | 75 (13.1)                     | 0.862 (0.589 - 1.262)        | 0.446         |
| GA-GA                                         | 8 (1.0)                     | 1 (0.4)                     | 0.399 (0.050 - 3.214)        | 0.388        | 6 (1.4)                       | 3 (0.5)                       | 0.465 (0.110 - 1.958)        | 0.296         |
| GA-AA                                         | 0 (0.0)                     | 0 (0.0)                     | N/A                          | N/A          | 0 (0.0)                       | 0 (0.0)                       | N/A                          | N/A           |
| AA-GG                                         | 11 (1.4)                    | 1 (0.4)                     | 0.290 (0.037 - 2.265)        | 0.238        | 7 (1.6)                       | 5 (0.9)                       | 0.556 (0.167 - 1.847)        | 0.338         |
| AA-GA                                         | 0 (0.0)                     | 0 (0.0)                     | N/A                          | N/A          | 0 (0.0)                       | 0 (0.0)                       | N/A                          | N/A           |
| AA-AA                                         | 0 (0.0)                     | 0 (0.0)                     | N/A                          | N/A          | 0 (0.0)                       | 0 (0.0)                       | N/A                          | N/A           |
| <b><i>PAI-1</i> 43G&gt;A/10692T&gt;C</b>      |                             |                             |                              |              |                               |                               |                              |               |
| GG-TT                                         | 219 (28.7)                  | 85 (36.2)                   | 1.000 (reference)            |              | 130 (30.6)                    | 174 (30.3)                    | 1.000 (reference)            |               |
| GG-TC                                         | 316 (41.4)                  | 86 (36.6)                   | <b>0.701 (0.496 - 0.991)</b> | <b>0.044</b> | 167 (39.3)                    | 235 (40.9)                    | 1.126 (0.821 - 1.544)        | 0.463         |
| GG-CC                                         | 104 (13.6)                  | 29 (12.3)                   | 0.718 (0.444 - 1.163)        | 0.179        | 51 (12.0)                     | 82 (14.3)                     | 1.289 (0.830 - 2.002)        | 0.259         |
| GA-TT                                         | 32 (4.2)                    | 7 (3.0)                     | 0.564 (0.240 - 1.326)        | 0.189        | 29 (6.8)                      | 10 (1.7)                      | <b>0.269 (0.120 - 0.604)</b> | <b>0.001</b>  |
| GA-TC                                         | 65 (8.5)                    | 18 (7.7)                    | 0.714 (0.400 - 1.273)        | 0.253        | 33 (7.8)                      | 50 (8.7)                      | 1.302 (0.770 - 2.202)        | 0.325         |
| GA-CC                                         | 17 (2.2)                    | 9 (3.8)                     | 1.364 (0.585 - 3.178)        | 0.472        | 8 (1.9)                       | 18 (3.1)                      | 1.773 (0.710 - 4.430)        | 0.220         |
| AA-TT                                         | 1 (0.1)                     | 0 (0.0)                     | N/A                          | N/A          | 0 (0.0)                       | 1 (0.2)                       | N/A                          | N/A           |
| AA-TC                                         | 5 (0.7)                     | 1 (0.4)                     | 0.515 (0.059 - 4.476)        | 0.548        | 4 (0.9)                       | 2 (0.3)                       | 0.445 (0.075 - 2.635)        | 0.372         |
| AA-CC                                         | 5 (0.7)                     | 0 (0.0)                     | N/A                          | N/A          | 3 (0.7)                       | 2 (0.3)                       | 0.517 (0.076 - 3.502)        | 0.499         |
| <b><i>PAI-1</i> 43G&gt;A/11053T&gt;G</b>      |                             |                             |                              |              |                               |                               |                              |               |
| GG-TT                                         | 166 (21.7)                  | 53 (22.6)                   | 1.000 (reference)            |              | 87 (20.5)                     | 132 (23.0)                    | 1.000 (reference)            |               |
| GG-TG                                         | 313 (41.0)                  | 87 (37.0)                   | 0.871 (0.590 - 1.286)        | 0.486        | 177 (41.6)                    | 223 (38.9)                    | 0.866 (0.612 - 1.224)        | 0.415         |
| GG-GG                                         | 160 (20.9)                  | 60 (25.5)                   | 1.175 (0.765 - 1.803)        | 0.462        | 84 (19.8)                     | 136 (23.7)                    | 1.042 (0.695 - 1.562)        | 0.842         |
| GA-TT                                         | 34 (4.5)                    | 15 (6.4)                    | 1.382 (0.699 - 2.732)        | 0.353        | 18 (4.2)                      | 31 (5.4)                      | 1.225 (0.625 - 2.402)        | 0.554         |
| GA-TG                                         | 60 (7.9)                    | 18 (7.7)                    | 0.940 (0.510 - 1.731)        | 0.842        | 36 (8.5)                      | 42 (7.3)                      | 0.800 (0.461 - 1.387)        | 0.426         |
| GA-GG                                         | 20 (2.6)                    | 1 (0.4)                     | 0.157 (0.021 - 1.195)        | 0.074        | 16 (3.8)                      | 5 (0.9)                       | <b>0.247 (0.085 - 0.712)</b> | <b>0.010</b>  |
| AA-TT                                         | 6 (0.8)                     | 0 (0.0)                     | N/A                          | N/A          | 3 (0.7)                       | 3 (0.5)                       | 0.690 (0.127 - 3.761)        | 0.668         |
| AA-TG                                         | 5 (0.7)                     | 1 (0.4)                     | 0.626 (0.072 - 5.482)        | 0.673        | 4 (0.9)                       | 2 (0.3)                       | 0.366 (0.062 - 2.167)        | 0.268         |
| AA-GG                                         | 0 (0.0)                     | 0 (0.0)                     | N/A                          | N/A          | 0 (0.0)                       | 0 (0.0)                       | N/A                          | N/A           |
| <b><i>PAI-1</i> 43G&gt;A/12068G&gt;A</b>      |                             |                             |                              |              |                               |                               |                              |               |
| GG-GG                                         | 232 (30.4)                  | 82 (34.9)                   | 1.000 (reference)            |              | 134 (31.5)                    | 180 (31.4)                    | 1.000 (reference)            |               |
| GG-GA                                         | 314 (41.1)                  | 90 (38.3)                   | 0.811 (0.575 - 1.144)        | 0.232        | 169 (39.8)                    | 235 (40.9)                    | 1.164 (0.849 - 1.595)        | 0.347         |
| GG-AA                                         | 93 (12.2)                   | 28 (11.9)                   | 0.852 (0.521 - 1.393)        | 0.523        | 45 (10.6)                     | 76 (13.2)                     | 1.329 (0.843 - 2.094)        | 0.221         |
| GA-GG                                         | 31 (4.1)                    | 5 (2.1)                     | 0.456 (0.172 - 1.213)        | 0.116        | 28 (6.6)                      | 8 (1.4)                       | <b>0.215 (0.092 - 0.502)</b> | <b>0.0003</b> |
| GA-GA                                         | 63 (8.2)                    | 20 (8.5)                    | 0.898 (0.512 - 1.576)        | 0.708        | 36 (8.5)                      | 47 (8.2)                      | 1.200 (0.700 - 2.055)        | 0.507         |
| GA-AA                                         | 20 (2.6)                    | 9 (3.8)                     | 1.273 (0.557 - 2.908)        | 0.567        | 6 (1.4)                       | 23 (4.0)                      | <b>3.184 (1.195 - 8.483)</b> | <b>0.021</b>  |
| AA-GG                                         | 2 (0.3)                     | 1 (0.4)                     | 1.415 (0.127 - 15.809)       | 0.778        | 1 (0.2)                       | 2 (0.3)                       | 0.970 (0.085 - 11.074)       | 0.981         |
| AA-GA                                         | 6 (0.8)                     | 0 (0.0)                     | N/A                          | N/A          | 5 (1.2)                       | 1 (0.2)                       | 0.230 (0.025 - 2.102)        | 0.193         |
| AA-AA                                         | 3 (0.4)                     | 0 (0.0)                     | N/A                          | N/A          | 1 (0.2)                       | 2 (0.3)                       | 1.772 (0.135 - 23.293)       | 0.663         |

MetS, metabolic syndrome; 95% CI, 95% confidence interval; AOR, adjusted odds ratio; N/A, not applicable.

<sup>a</sup> Adjusted by age, sex, hypertension, diabetes mellitus, hyperlipidemia, and smoking.

Supplementary Table S8. Combined genotype analysis for the *PAI-1* polymorphisms in ischemic metabolic syndrome patients, stroke patients and controls

| Genotype                                    | MetS<br>controls<br>(n=764) | MetS<br>patients<br>(n=235) | OR (95% CI)                  | <i>P</i>     | Stroke<br>controls<br>(n=425) | Stroke<br>patients<br>(n=574) | AOR (95% CI) <sup>a</sup>    | <i>P</i>     |
|---------------------------------------------|-----------------------------|-----------------------------|------------------------------|--------------|-------------------------------|-------------------------------|------------------------------|--------------|
| <b><i>PAI-1</i> 9785G&gt;A/10692T&gt;C</b>  |                             |                             |                              |              |                               |                               |                              |              |
| GG-TT                                       | 241 (31.5)                  | 86 (36.6)                   | 1.000 (reference)            |              | 152 (35.8)                    | 175 (30.5)                    | 1.000 (reference)            |              |
| GG-TC                                       | 360 (47.1)                  | 100 (42.6)                  | 0.778 (0.559 - 1.084)        | 0.138        | 190 (44.7)                    | 270 (47.0)                    | 1.335 (0.989 - 1.803)        | 0.059        |
| GG-CC                                       | 107 (14.0)                  | 33 (14.0)                   | 0.864 (0.545 - 1.371)        | 0.536        | 54 (12.7)                     | 86 (15.0)                     | 1.452 (0.947 - 2.226)        | 0.087        |
| GA-TT                                       | 11 (1.4)                    | 6 (2.6)                     | 1.529 (0.549 - 4.259)        | 0.417        | 7 (1.6)                       | 10 (1.7)                      | 1.072 (0.376 - 3.062)        | 0.896        |
| GA-TC                                       | 26 (3.4)                    | 5 (2.1)                     | 0.539 (0.201 - 1.448)        | 0.220        | 14 (3.3)                      | 17 (3.0)                      | 1.103 (0.507 - 2.401)        | 0.805        |
| GA-CC                                       | 17 (2.2)                    | 5 (2.1)                     | 0.824 (0.295 - 2.302)        | 0.712        | 7 (1.6)                       | 15 (2.6)                      | 2.259 (0.850 - 6.004)        | 0.102        |
| AA-TT                                       | 0 (0.0)                     | 0 (0.0)                     | N/A                          | N/A          | 0 (0.0)                       | 0 (0.0)                       | N/A                          | N/A          |
| AA-TC                                       | 0 (0.0)                     | 0 (0.0)                     | N/A                          | N/A          | 0 (0.0)                       | 0 (0.0)                       | N/A                          | N/A          |
| AA-CC                                       | 2 (0.3)                     | 0 (0.0)                     | N/A                          | N/A          | 1 (0.2)                       | 1 (0.2)                       | N/A                          | N/A          |
| <b><i>PAI-1</i> 9785G&gt;A/11053T&gt;G</b>  |                             |                             |                              |              |                               |                               |                              |              |
| GG-TT                                       | 176 (23.0)                  | 61 (26.0)                   | 1.000 (reference)            |              | 94 (22.1)                     | 143 (24.9)                    | 1.000 (reference)            |              |
| GG-TG                                       | 355 (46.5)                  | 99 (42.1)                   | 0.805 (0.558 - 1.161)        | 0.245        | 205 (48.2)                    | 249 (43.4)                    | 0.827 (0.594 - 1.152)        | 0.262        |
| GG-GG                                       | 177 (23.2)                  | 59 (25.1)                   | 0.962 (0.636 - 1.455)        | 0.854        | 97 (22.8)                     | 139 (24.2)                    | 0.915 (0.622 - 1.347)        | 0.653        |
| GA-TT                                       | 28 (3.7)                    | 7 (3.0)                     | 0.721 (0.300 - 1.736)        | 0.466        | 13 (3.1)                      | 22 (3.8)                      | 1.210 (0.559 - 2.616)        | 0.629        |
| GA-TG                                       | 23 (3.0)                    | 7 (3.0)                     | 0.878 (0.359 - 2.149)        | 0.776        | 12 (2.8)                      | 18 (3.1)                      | 0.952 (0.421 - 2.150)        | 0.905        |
| GA-GG                                       | 3 (0.4)                     | 2 (0.9)                     | 1.924 (0.314 - 11.786)       | 0.479        | 3 (0.7)                       | 2 (0.3)                       | 0.344 (0.053 - 2.227)        | 0.263        |
| AA-TT                                       | 2 (0.3)                     | 0 (0.0)                     | N/A                          | N/A          | 1 (0.2)                       | 1 (0.2)                       | N/A                          | N/A          |
| AA-TG                                       | 0 (0.0)                     | 0 (0.0)                     | N/A                          | N/A          | 0 (0.0)                       | 0 (0.0)                       | N/A                          | N/A          |
| AA-GG                                       | 0 (0.0)                     | 0 (0.0)                     | N/A                          | N/A          | 0 (0.0)                       | 0 (0.0)                       | N/A                          | N/A          |
| <b><i>PAI-1</i> 9785G&gt;A/12068G&gt;A</b>  |                             |                             |                              |              |                               |                               |                              |              |
| GG-GG                                       | 237 (31.0)                  | 78 (33.2)                   | 1.000 (reference)            |              | 151 (35.5)                    | 164 (28.6)                    | 1.000 (reference)            |              |
| GG-GA                                       | 357 (46.7)                  | 104 (44.3)                  | 0.885 (0.632 - 1.239)        | 0.477        | 195 (45.9)                    | 266 (46.3)                    | <b>1.415 (1.041 - 1.923)</b> | <b>0.027</b> |
| GG-AA                                       | 114 (14.9)                  | 37 (15.7)                   | 0.986 (0.629 - 1.548)        | 0.952        | 50 (11.8)                     | 101 (17.6)                    | <b>1.944 (1.270 - 2.974)</b> | <b>0.002</b> |
| GA-GG                                       | 27 (3.5)                    | 10 (4.3)                    | 1.125 (0.521 - 2.429)        | 0.764        | 12 (2.8)                      | 25 (4.4)                      | 1.766 (0.828 - 3.768)        | 0.141        |
| GA-GA                                       | 25 (3.3)                    | 6 (2.6)                     | 0.729 (0.289 - 1.843)        | 0.504        | 14 (3.3)                      | 17 (3.0)                      | 1.323 (0.598 - 2.926)        | 0.490        |
| GA-AA                                       | 2 (0.3)                     | 0 (0.0)                     | N/A                          | N/A          | 2 (0.5)                       | 0 (0.0)                       | N/A                          | N/A          |
| AA-GG                                       | 1 (0.1)                     | 0 (0.0)                     | N/A                          | N/A          | 0 (0.0)                       | 1 (0.2)                       | N/A                          | N/A          |
| AA-GA                                       | 1 (0.1)                     | 0 (0.0)                     | N/A                          | N/A          | 1 (0.2)                       | 0 (0.0)                       | N/A                          | N/A          |
| AA-AA                                       | 0 (0.0)                     | 0 (0.0)                     | N/A                          | N/A          | 0 (0.0)                       | 0 (0.0)                       | N/A                          | N/A          |
| <b><i>PAI-1</i> 10692T&gt;C/11053T&gt;G</b> |                             |                             |                              |              |                               |                               |                              |              |
| TT-TT                                       | 28 (3.7)                    | 17 (7.2)                    | 1.000 (reference)            |              | 19 (4.5)                      | 26 (4.5)                      | 1.000 (reference)            |              |
| TT-TG                                       | 59 (7.7)                    | 18 (7.7)                    | 0.503 (0.226 - 1.120)        | 0.092        | 45 (10.6)                     | 32 (5.6)                      | 0.580 (0.255 - 1.317)        | 0.193        |
| TT-GG                                       | 165 (21.6)                  | 57 (24.3)                   | 0.569 (0.290 - 1.116)        | 0.101        | 95 (22.4)                     | 127 (22.1)                    | 1.067 (0.532 - 2.140)        | 0.855        |
| TC-TT                                       | 59 (7.7)                    | 16 (6.8)                    | 0.447 (0.197 - 1.012)        | 0.053        | 30 (7.1)                      | 45 (7.8)                      | 1.335 (0.594 - 3.003)        | 0.485        |
| TC-TG                                       | 315 (41.2)                  | 85 (36.2)                   | <b>0.444 (0.232 - 0.850)</b> | <b>0.014</b> | 170 (40.0)                    | 230 (40.1)                    | 1.165 (0.610 - 2.226)        | 0.644        |
| TC-GG                                       | 12 (1.6)                    | 4 (1.7)                     | 0.549 (0.152 - 1.979)        | 0.359        | 4 (0.9)                       | 12 (2.1)                      | 1.890 (0.456 - 7.830)        | 0.380        |
| CC-TT                                       | 119 (15.6)                  | 35 (14.9)                   | <b>0.484 (0.238 - 0.986)</b> | <b>0.046</b> | 59 (13.9)                     | 95 (16.6)                     | 1.381 (0.665 - 2.872)        | 0.387        |
| CC-TG                                       | 4 (0.5)                     | 3 (1.3)                     | 1.235 (0.246 - 6.203)        | 0.797        | 2 (0.5)                       | 5 (0.9)                       | 4.567 (0.571 - 36.526)       | 0.152        |
| CC-GG                                       | 3 (0.4)                     | 0 (0.0)                     | 0.000 (0.000 - 0.000)        | 0.994        | 1 (0.2)                       | 2 (0.3)                       | 6.053 (0.135 - 272.385)      | 0.354        |
| <b><i>PAI-1</i> 10692T&gt;C/12068G&gt;A</b> |                             |                             |                              |              |                               |                               |                              |              |
| TT-GG                                       | 186 (24.3)                  | 66 (28.1)                   | 1.000 (reference)            |              | 120 (28.2)                    | 132 (23.0)                    | 1.000 (reference)            |              |
| TT-GA                                       | 60 (7.9)                    | 21 (8.9)                    | 0.986 (0.557 - 1.746)        | 0.962        | 37 (8.7)                      | 44 (7.7)                      | 1.255 (0.736 - 2.139)        | 0.405        |
| TT-AA                                       | 6 (0.8)                     | 5 (2.1)                     | 2.349 (0.694 - 7.952)        | 0.170        | 2 (0.5)                       | 9 (1.6)                       | 4.327 (0.842 - 22.235)       | 0.079        |
| TC-GG                                       | 74 (9.7)                    | 17 (7.2)                    | 0.647 (0.356 - 1.177)        | 0.154        | 42 (9.9)                      | 49 (8.5)                      | 1.081 (0.651 - 1.797)        | 0.763        |
| TC-GA                                       | 283 (37.0)                  | 79 (33.6)                   | 0.787 (0.540 - 1.145)        | 0.211        | 150 (35.3)                    | 212 (36.9)                    | <b>1.485 (1.051 - 2.098)</b> | <b>0.025</b> |
| TC-AA                                       | 29 (3.8)                    | 9 (3.8)                     | 0.875 (0.393 - 1.944)        | 0.742        | 12 (2.8)                      | 26 (4.5)                      | 2.143 (0.996 - 4.609)        | 0.051        |
| CC-GG                                       | 5 (0.7)                     | 5 (2.1)                     | 2.818 (0.791 - 10.045)       | 0.110        | 1 (0.2)                       | 9 (1.6)                       | 6.321 (0.709 - 56.389)       | 0.099        |
| CC-GA                                       | 40 (5.2)                    | 10 (4.3)                    | 0.705 (0.334 - 1.488)        | 0.359        | 23 (5.4)                      | 27 (4.7)                      | 1.283 (0.665 - 2.474)        | 0.457        |
| CC-AA                                       | 81 (10.6)                   | 23 (9.8)                    | 0.800 (0.466 - 1.375)        | 0.420        | 38 (8.9)                      | 66 (11.5)                     | <b>1.707 (1.039 - 2.804)</b> | <b>0.035</b> |

MetS, metabolic syndrome; 95% CI, 95% confidence interval; AOR, adjusted odds ratio; N/A, not applicable.

<sup>a</sup> Adjusted by age, sex, hypertension, diabetes mellitus, hyperlipidemia, and smoking.



Supplementary Table S9. Clinical variables in ischemic stroke patients stratified by *PAI-I* polymorphisms status by ANOVA

| Characteristics                   | Homocysteine (mmol/L) |                    | Folate (mg/ml)  |                    | Vitamin B12 (pg/ml)  |                          | Total cholesterol (mg/dl) |                    | Triglyceride (mg/dl) |                    | PLT ( $10^3/\mu\text{l}$ ) |                    | BMI (kg/m <sup>2</sup> ) |                |
|-----------------------------------|-----------------------|--------------------|-----------------|--------------------|----------------------|--------------------------|---------------------------|--------------------|----------------------|--------------------|----------------------------|--------------------|--------------------------|----------------|
|                                   | Mean $\pm$ SD         | P <sup>a</sup>     | Mean $\pm$ SD   | P <sup>a</sup>     | Mean $\pm$ SD        | P <sup>a</sup>           | Mean $\pm$ SD             | P <sup>a</sup>     | Mean $\pm$ SD        | P <sup>a</sup>     | Mean $\pm$ SD              | P <sup>a</sup>     | Mean $\pm$ SD            | P <sup>a</sup> |
| <b><i>PAI-I</i> -844G&gt;A</b>    |                       |                    |                 |                    |                      |                          |                           |                    |                      |                    |                            |                    |                          |                |
| GG                                | 10.11 $\pm$ 4.00      | 0.080              | 7.71 $\pm$ 5.58 | 0.943              | 745.42 $\pm$ 718.65  | 0.985                    | 190.29 $\pm$ 37.86        | 0.158 <sup>b</sup> | 151.21 $\pm$ 104.46  | 0.619              | 244.02 $\pm$ 86.77         | 0.578              | 24.14 $\pm$ 3.16         | 0.744          |
| GA                                | 11.01 $\pm$ 6.68      |                    | 7.86 $\pm$ 7.44 |                    | 739.71 $\pm$ 604.99  |                          | 193.40 $\pm$ 39.02        |                    | 149.89 $\pm$ 95.69   |                    | 247.21 $\pm$ 71.30         |                    | 24.14 $\pm$ 3.04         |                |
| AA                                | 10.75 $\pm$ 6.32      |                    | 7.83 $\pm$ 5.51 |                    | 735.34 $\pm$ 543.02  |                          | 194.97 $\pm$ 43.02        |                    | 142.26 $\pm$ 75.53   |                    | 252.00 $\pm$ 86.54         |                    | 24.39 $\pm$ 3.45         |                |
| Dominant (GG vs GA+AA)            | 10.95 $\pm$ 6.59      | 0.165 <sup>c</sup> | 7.85 $\pm$ 7.02 | 0.595 <sup>c</sup> | 738.66 $\pm$ 590.24  | 0.294 <sup>c</sup>       | 193.78 $\pm$ 39.98        | 0.180              | 148.06 $\pm$ 91.27   | 0.807 <sup>c</sup> | 248.36 $\pm$ 75.22         | 0.190 <sup>c</sup> | 24.20 $\pm$ 3.14         | 0.788          |
| Recessive (GG+GA vs AA)           | 10.75 $\pm$ 6.32      | 0.802              | 7.83 $\pm$ 5.51 | 0.797 <sup>c</sup> | 735.34 $\pm$ 543.02  | 0.481 <sup>c</sup>       | 194.97 $\pm$ 43.02        | 0.404              | 142.26 $\pm$ 75.53   | 0.958 <sup>c</sup> | 252.00 $\pm$ 86.54         | 0.381              | 24.39 $\pm$ 3.45         | 0.442          |
| <b><i>PAI-I</i> -675 4G&gt;5G</b> |                       |                    |                 |                    |                      |                          |                           |                    |                      |                    |                            |                    |                          |                |
| 4G4G                              | 10.46 $\pm$ 4.85      | 0.347              | 7.59 $\pm$ 4.68 | 0.380              | 720.68 $\pm$ 484.36  | 0.578                    | 194.91 $\pm$ 40.53        | 0.136              | 145.12 $\pm$ 92.71   | 0.213              | 252.38 $\pm$ 91.82         | 0.184              | 24.13 $\pm$ 3.01         | 0.787          |
| 4G5G                              | 10.93 $\pm$ 6.58      |                    | 8.20 $\pm$ 8.29 |                    | 764.90 $\pm$ 728.88  |                          | 192.14 $\pm$ 39.57        |                    | 155.19 $\pm$ 104.99  |                    | 243.97 $\pm$ 72.59         |                    | 24.06 $\pm$ 3.15         |                |
| 5G5G                              | 10.28 $\pm$ 5.61      |                    | 7.21 $\pm$ 4.56 |                    | 725.25 $\pm$ 708.50  |                          | 187.56 $\pm$ 34.49        |                    | 142.74 $\pm$ 76.93   |                    | 240.77 $\pm$ 63.48         |                    | 24.57 $\pm$ 3.41         |                |
| Dominant (4G4G vs 4G5G+5G5G)      | 10.76 $\pm$ 6.34      | 0.587 <sup>c</sup> | 7.94 $\pm$ 7.51 | 0.380 <sup>c</sup> | 754.51 $\pm$ 723.21  | 0.120                    | 190.93 $\pm$ 38.32        | 0.279              | 151.90 $\pm$ 98.46   | 0.124 <sup>c</sup> | 243.12 $\pm$ 70.25         | 0.067 <sup>c</sup> | 24.20 $\pm$ 3.23         | 0.756          |
| Recessive (4G4G+4G5G vs 5G5G)     | 10.28 $\pm$ 5.61      | 0.393              | 7.21 $\pm$ 4.56 | 0.405 <sup>c</sup> | 725.25 $\pm$ 708.50  | <b>0.023<sup>c</sup></b> | 187.56 $\pm$ 34.49        | 0.152 <sup>c</sup> | 142.74 $\pm$ 76.93   | 0.979 <sup>c</sup> | 240.77 $\pm$ 63.48         | 0.398 <sup>c</sup> | 24.57 $\pm$ 3.41         | 0.108          |
| <b><i>PAI-I</i> 43G&gt;A</b>      |                       |                    |                 |                    |                      |                          |                           |                    |                      |                    |                            |                    |                          |                |
| GG                                | 10.79 $\pm$ 6.11      | 0.145              | 7.83 $\pm$ 6.72 | 0.924              | 751.71 $\pm$ 681.13  | 0.467                    | 192.45 $\pm$ 38.75        | 0.988              | 149.53 $\pm$ 98.84   | 0.599              | 246.90 $\pm$ 81.45         | 0.909              | 24.11 $\pm$ 3.08         | 0.264          |
| GA                                | 9.86 $\pm$ 3.63       |                    | 7.60 $\pm$ 5.57 |                    | 688.67 $\pm$ 337.51  |                          | 192.95 $\pm$ 42.37        |                    | 149.62 $\pm$ 83.13   |                    | 245.43 $\pm$ 70.05         |                    | 24.62 $\pm$ 3.49         |                |
| AA                                | 9.27 $\pm$ 2.35       |                    | 7.98 $\pm$ 4.05 |                    | 630.82 $\pm$ 272.70  |                          | 191.75 $\pm$ 37.04        |                    | 121.25 $\pm$ 41.42   |                    | 255.58 $\pm$ 57.15         |                    | 23.49 $\pm$ 3.13         |                |
| Dominant (GG vs GA+AA)            | 9.82 $\pm$ 3.55       | 0.258 <sup>c</sup> | 7.63 $\pm$ 5.47 | 0.777 <sup>c</sup> | 684.56 $\pm$ 332.91  | 0.446 <sup>c</sup>       | 192.86 $\pm$ 41.87        | 0.905              | 147.41 $\pm$ 80.93   | 0.663 <sup>c</sup> | 246.21 $\pm$ 69.04         | 0.846 <sup>c</sup> | 24.54 $\pm$ 3.47         | 0.175          |
| Recessive (GG+GA vs AA)           | 9.27 $\pm$ 2.35       | 0.554 <sup>c</sup> | 7.98 $\pm$ 4.05 | 0.926              | 630.82 $\pm$ 272.70  | 0.385 <sup>c</sup>       | 191.75 $\pm$ 37.04        | 0.946              | 121.25 $\pm$ 41.42   | 0.579 <sup>c</sup> | 255.58 $\pm$ 57.15         | 0.700              | 23.49 $\pm$ 3.13         | 0.534          |
| <b><i>PAI-I</i> 9785G&gt;A</b>    |                       |                    |                 |                    |                      |                          |                           |                    |                      |                    |                            |                    |                          |                |
| GG                                | 10.69 $\pm$ 5.95      | 0.577              | 7.80 $\pm$ 6.63 | 0.996              | 739.95 $\pm$ 650.83  | 0.903                    | 192.52 $\pm$ 39.14        | 0.398              | 149.09 $\pm$ 96.97   | 0.991              | 246.44 $\pm$ 80.94         | 0.789              | 24.18 $\pm$ 3.11         | 0.960          |
| GA                                | 9.95 $\pm$ 3.11       |                    | 7.86 $\pm$ 5.23 |                    | 760.81 $\pm$ 477.19  |                          | 191.29 $\pm$ 40.75        |                    | 150.69 $\pm$ 87.51   |                    | 252.04 $\pm$ 60.45         |                    | 24.16 $\pm$ 3.67         |                |
| AA                                | 10.07 $\pm$ 0.98      |                    | 7.61 $\pm$ 0.47 |                    | 574.50 $\pm$ 74.25   |                          | 229.50 $\pm$ 23.33        |                    | 150.00 $\pm$ 73.54   |                    | 224.50 $\pm$ 10.61         |                    | 22.00 $\pm$ 0.00         |                |
| Dominant (GG vs GA+AA)            | 9.95 $\pm$ 3.07       | 0.784 <sup>c</sup> | 7.86 $\pm$ 5.15 | 0.508 <sup>c</sup> | 755.64 $\pm$ 471.52  | 0.682 <sup>c</sup>       | 192.35 $\pm$ 40.76        | 0.971              | 150.67 $\pm$ 86.70   | 0.893              | 251.27 $\pm$ 59.77         | 0.199 <sup>c</sup> | 24.12 $\pm$ 3.65         | 0.893          |
| Recessive (GG+GA vs AA)           | 10.07 $\pm$ 0.98      | 0.889              | 7.61 $\pm$ 0.47 | 0.967              | 574.50 $\pm$ 74.25   | 0.712                    | 229.50 $\pm$ 23.33        | 0.182              | 150.00 $\pm$ 73.54   | 0.991              | 224.50 $\pm$ 10.61         | 0.692              | 22.00 $\pm$ 0.00         | 0.489          |
| <b><i>PAI-I</i> 10692T&gt;C</b>   |                       |                    |                 |                    |                      |                          |                           |                    |                      |                    |                            |                    |                          |                |
| TT                                | 10.74 $\pm$ 4.96      | 0.781              | 7.93 $\pm$ 5.70 | 0.908              | 750.07 $\pm$ 630.89  | 0.320                    | 192.09 $\pm$ 39.85        | 0.962              | 147.54 $\pm$ 101.25  | 0.775              | 246.07 $\pm$ 93.49         | 0.962              | 23.97 $\pm$ 2.96         | 0.245          |
| TC                                | 10.51 $\pm$ 5.53      |                    | 7.73 $\pm$ 7.05 |                    | 700.84 $\pm$ 401.96  |                          | 192.61 $\pm$ 39.23        |                    | 151.38 $\pm$ 97.10   |                    | 246.83 $\pm$ 71.18         |                    | 24.32 $\pm$ 3.20         |                |
| CC                                | 10.81 $\pm$ 7.82      |                    | 7.75 $\pm$ 6.61 |                    | 843.40 $\pm$ 1079.74 |                          | 193.09 $\pm$ 38.22        |                    | 146.16 $\pm$ 82.23   |                    | 248.17 $\pm$ 71.96         |                    | 24.17 $\pm$ 3.35         |                |
| Dominant (TT vs TC+CC)            | 10.59 $\pm$ 6.18      | 0.250 <sup>c</sup> | 7.74 $\pm$ 6.93 | 0.368 <sup>c</sup> | 736.42 $\pm$ 643.93  | 0.751                    | 192.73 $\pm$ 38.95        | 0.808              | 150.07 $\pm$ 93.55   | 0.696              | 247.17 $\pm$ 71.32         | 0.582 <sup>c</sup> | 24.28 $\pm$ 3.23         | 0.196          |
| Recessive (TT+TC vs CC)           | 10.81 $\pm$ 7.82      | 0.947 <sup>c</sup> | 7.75 $\pm$ 6.61 | 0.922              | 843.40 $\pm$ 1079.74 | 0.265 <sup>c</sup>       | 193.09 $\pm$ 38.22        | 0.838              | 146.16 $\pm$ 82.23   | 0.782 <sup>c</sup> | 248.17 $\pm$ 71.96         | 0.809              | 24.17 $\pm$ 3.35         | 0.977          |
| <b><i>PAI-I</i> 11053T&gt;G</b>   |                       |                    |                 |                    |                      |                          |                           |                    |                      |                    |                            |                    |                          |                |
| TT                                | 10.28 $\pm$ 6.27      | 0.483              | 7.90 $\pm$ 8.39 | 0.949              | 796.25 $\pm$ 892.43  | 0.667                    | 195.19 $\pm$ 37.60        | 0.217              | 149.13 $\pm$ 99.31   | 0.935              | 247.57 $\pm$ 73.55         | 0.661              | 24.17 $\pm$ 3.25         | 0.944          |
| TG                                | 10.76 $\pm$ 5.80      |                    | 7.79 $\pm$ 5.96 |                    | 707.22 $\pm$ 409.48  |                          | 190.30 $\pm$ 39.89        |                    | 148.30 $\pm$ 95.36   |                    | 242.79 $\pm$ 67.54         |                    | 24.29 $\pm$ 3.15         |                |
| GG                                | 10.80 $\pm$ 5.17      |                    | 7.71 $\pm$ 5.10 |                    | 746.74 $\pm$ 672.34  |                          | 193.88 $\pm$ 39.68        |                    | 151.10 $\pm$ 94.72   |                    | 253.99 $\pm$ 104.63        |                    | 23.95 $\pm$ 3.02         |                |
| Dominant (TT vs TG+GG)            | 10.78 $\pm$ 5.60      | 0.358 <sup>c</sup> | 7.77 $\pm$ 5.69 | 0.611 <sup>c</sup> | 720.26 $\pm$ 511.25  | 0.667 <sup>c</sup>       | 191.49 $\pm$ 39.83        | 0.186              | 149.23 $\pm$ 95.09   | 0.989              | 246.50 $\pm$ 81.80         | 0.661 <sup>c</sup> | 24.18 $\pm$ 3.11         | 0.967          |
| Recessive (TT+TG vs GG)           | 10.80 $\pm$ 5.17      | 0.513 <sup>c</sup> | 7.71 $\pm$ 5.10 | 0.775 <sup>c</sup> | 746.74 $\pm$ 672.34  | 0.877                    | 193.88 $\pm$ 39.68        | 0.539              | 151.10 $\pm$ 94.72   | 0.728              | 253.99 $\pm$ 104.63        | 0.176 <sup>c</sup> | 23.95 $\pm$ 3.02         | 0.256          |
| <b><i>PAI-I</i> 12068G&gt;A</b>   |                       |                    |                 |                    |                      |                          |                           |                    |                      |                    |                            |                    |                          |                |
| GG                                | 10.64 $\pm$ 4.53      | 0.827              | 8.10 $\pm$ 7.72 | 0.272              | 743.00 $\pm$ 601.25  | 0.422                    | 192.50 $\pm$ 40.95        | 0.998              | 146.90 $\pm$ 87.05   | 0.564              | 254.80 $\pm$ 100.90        | 0.112              | 24.11 $\pm$ 3.24         | 0.786          |
| GA                                | 10.72 $\pm$ 6.92      |                    | 7.46 $\pm$ 5.24 |                    | 723.55 $\pm$ 515.79  |                          | 192.46 $\pm$ 38.23        |                    | 152.41 $\pm$ 106.50  |                    | 241.19 $\pm$ 63.11         |                    | 24.27 $\pm$ 3.08         |                |
| AA                                | 10.39 $\pm$ 4.20      |                    | 8.21 $\pm$ 7.28 |                    | 794.40 $\pm$ 995.98  |                          | 192.70 $\pm$ 38.66        |                    | 144.18 $\pm$ 80.43   |                    | 246.28 $\pm$ 69.45         |                    | 24.02 $\pm$ 3.17         |                |
| Dominant (GG vs GA+AA)            | 10.64 $\pm$ 6.38      | 0.150 <sup>c</sup> | 7.64 $\pm$ 5.78 | 0.413 <sup>c</sup> | 740.06 $\pm$ 659.42  | 0.945                    | 192.52 $\pm$ 38.30        | 0.994              | 150.47 $\pm$ 100.94  | 0.799 <sup>c</sup> | 242.39 $\pm$ 64.64         | 0.112 <sup>c</sup> | 24.21 $\pm$ 3.10         | 0.663          |
| Recessive (GG+GA vs AA)           | 10.39 $\pm$ 4.20      | 0.880 <sup>c</sup> | 8.21 $\pm$ 7.28 | 0.764 <sup>c</sup> | 794.40 $\pm$ 995.98  | 0.244 <sup>c</sup>       | 192.70 $\pm$ 38.66        | 0.949              | 144.18 $\pm$ 80.43   | 0.959 <sup>c</sup> | 246.28 $\pm$ 69.45         | 0.666 <sup>c</sup> | 24.02 $\pm$ 3.17         | 0.544          |

ANOVA, analysis of variance; PLT, platelet; SD, standard deviation.

<sup>a</sup> Calculated using ANOVA. <sup>b</sup> Calculated using the Kruskal-Wallis test. <sup>c</sup> Calculated using the Mann-Whitney test.

**Supplementary Table S10. Clinical variables in ischemic stroke patients stratified by *PAI-I* polymorphisms status by ANOVA.**

| Characteristics                   | PT (sec)   |                          | aPTT (sec)  |                          | Fibrinogen (mg/dl) |                    | Antithrombin III (%) |                    | BUN (mg/dl) |                    | Uric Acid (mg/dl) |                    | HDL-cholesterol (mg/dl) |                |
|-----------------------------------|------------|--------------------------|-------------|--------------------------|--------------------|--------------------|----------------------|--------------------|-------------|--------------------|-------------------|--------------------|-------------------------|----------------|
|                                   | Mean ± SD  | P <sup>a</sup>           | Mean ± SD   | P <sup>a</sup>           | Mean ± SD          | P <sup>a</sup>     | Mean ± SD            | P <sup>a</sup>     | Mean ± SD   | P <sup>a</sup>     | Mean ± SD         | P <sup>a</sup>     | Mean ± SD               | P <sup>a</sup> |
| <b><i>PAI-I -844G&gt;A</i></b>    |            |                          |             |                          |                    |                    |                      |                    |             |                    |                   |                    |                         |                |
| GG                                | 11.82±1.17 | 0.917 <sup>b</sup>       | 31.69±8.67  | 0.628                    | 409.98±135.24      | 0.495              | 95.28±35.55          | 0.506              | 15.78±5.29  | 0.819              | 4.61±1.51         | 0.609              | 45.30±14.91             | 0.915          |
| GA                                | 11.75±0.72 |                          | 31.56±14.31 |                          | 421.89±125.09      |                    | 93.10±18.95          |                    | 15.99±7.04  |                    | 4.70±1.58         |                    | 45.31±15.90             |                |
| AA                                | 11.74±0.82 |                          | 30.56±5.22  |                          | 410.58±115.38      |                    | 95.82±15.47          |                    | 16.13±7.02  |                    | 4.58±1.35         |                    | 46.40±11.57             |                |
| Dominant (GG vs GA+AA)            | 11.75±0.74 | 0.917 <sup>c</sup>       | 31.33±12.81 | 0.249 <sup>c</sup>       | 419.40±122.97      | 0.360              | 93.70±18.26          | 0.881 <sup>c</sup> | 16.03±7.03  | 0.695 <sup>c</sup> | 4.67±1.53         | 0.578              | 45.56±15.01             | 0.823          |
| Recessive (GG+GA vs AA)           | 11.74±0.82 | 0.598                    | 30.56±5.22  | 0.360 <sup>c</sup>       | 410.58±115.38      | 0.662              | 95.82±15.47          | 0.165 <sup>c</sup> | 16.13±7.02  | 0.684              | 4.58±1.35         | 0.704 <sup>c</sup> | 46.40±11.57             | 0.489          |
| <b><i>PAI-I -675 4G&gt;5G</i></b> |            |                          |             |                          |                    |                    |                      |                    |             |                    |                   |                    |                         |                |
| 4G4G                              | 11.75±0.82 | 0.519                    | 30.87±6.87  | 0.479                    | 421.32±131.07      | 0.626              | 93.34±16.71          | 0.081              | 15.72±4.92  | 0.497              | 4.53±1.47         | 0.072              | 45.27±13.44             | 0.390          |
| 4G5G                              | 11.82±1.03 |                          | 31.82±14.95 |                          | 414.43±123.28      |                    | 93.22±20.10          |                    | 16.21±7.87  |                    | 4.77±1.57         |                    | 45.57±16.58             |                |
| 5G5G                              | 11.74±0.83 |                          | 31.90±9.01  |                          | 407.88±131.38      |                    | 99.30±47.89          |                    | 15.71±5.40  |                    | 4.60±1.51         |                    | 45.65±13.86             |                |
| Dominant (4G4G vs 4G5G+5G5G)      | 11.80±0.98 | 0.495 <sup>c</sup>       | 31.84±13.58 | 0.172 <sup>c</sup>       | 412.64±125.41      | 0.395              | 94.86±30.28          | 0.904 <sup>c</sup> | 16.08±7.30  | 0.993 <sup>c</sup> | 4.73±1.55         | 0.050              | 45.59±15.87             | 0.780          |
| Recessive (4G4G+4G5G vs 5G5G)     | 11.74±0.83 | 0.602                    | 31.90±9.01  | 0.208 <sup>c</sup>       | 407.88±131.38      | 0.463              | 99.30±47.89          | 0.119 <sup>c</sup> | 15.71±5.40  | 0.723 <sup>c</sup> | 4.60±1.51         | 0.686              | 45.65±13.86             | 0.882          |
| <b><i>PAI-I 43G&gt;A</i></b>      |            |                          |             |                          |                    |                    |                      |                    |             |                    |                   |                    |                         |                |
| GG                                | 11.79±0.93 | 0.134                    | 31.62±12.32 | 0.656                    | 416.97±128.49      | 0.611              | 94.31±27.23          | 0.943              | 16.03±6.77  | 0.547              | 4.66±1.52         | 0.755              | 45.40±13.78             | 0.052          |
| GA                                | 11.68±0.87 |                          | 30.62±3.86  |                          | 406.90±121.80      |                    | 93.95±17.48          |                    | 15.43±4.38  |                    | 4.59±1.55         |                    | 45.81±21.48             |                |
| AA                                | 12.26±0.93 |                          | 30.40±3.26  |                          | 450.00±134.83      |                    | 97.67±11.74          |                    | 15.35±4.75  |                    | 4.42±1.30         |                    | 47.02±9.98              |                |
| Dominant (GG vs GA+AA)            | 11.73±0.88 | 0.501                    | 30.61±3.81  | 0.595 <sup>c</sup>       | 410.01±122.54      | 0.620              | 94.18±17.15          | 0.423 <sup>c</sup> | 15.42±4.39  | 0.725 <sup>c</sup> | 4.58±1.53         | 0.517              | 45.87±21.01             | 0.771          |
| Recessive (GG+GA vs AA)           | 12.26±0.93 | 0.099                    | 30.40±3.26  | 0.904 <sup>c</sup>       | 450.00±134.83      | 0.478              | 97.67±11.74          | 0.749              | 15.35±4.75  | 0.752              | 4.42±1.30         | 0.594              | 47.02±9.98              | 0.816          |
| <b><i>PAI-I 9785G&gt;A</i></b>    |            |                          |             |                          |                    |                    |                      |                    |             |                    |                   |                    |                         |                |
| GG                                | 11.78±0.93 | 0.873                    | 31.20±7.19  | 0.465 <sup>b</sup>       | 413.25±125.75      | 0.050              | 93.89±25.92          | 0.158              | 15.97±6.56  | 0.838              | 4.66±1.53         | 0.772              | 45.48±15.26             | 0.471          |
| GA                                | 11.75±0.88 |                          | 35.01±34.80 |                          | 450.74±146.07      |                    | 99.46±26.88          |                    | 15.49±5.07  |                    | 4.52±1.40         |                    | 45.25±10.56             |                |
| AA                                | 11.35±0.00 |                          | 33.10±0.00  |                          | 0.00±0.00          |                    | 0.00±0.00            |                    | 16.20±3.11  |                    | 4.75±0.07         |                    | 0.00±0.00               |                |
| Dominant (GG vs GA+AA)            | 11.74±0.87 | 0.767                    | 34.98±34.51 | 0.465 <sup>c</sup>       | 450.74±146.07      | 0.050              | 99.46±26.88          | 0.158              | 15.51±5.01  | 0.568 <sup>c</sup> | 4.53±1.38         | 0.490              | 45.25±10.56             | 0.915          |
| Recessive (GG+GA vs AA)           | 11.35±0.00 | N/A                      | 33.10±0.00  | N/A                      | 0.00±0.00          | N/A                | 0.00±0.00            | N/A                | 16.20±3.11  | 0.954              | 4.75±0.07         | 0.926              | 0.00±0.00               |                |
| <b><i>PAI-I 10692T&gt;C</i></b>   |            |                          |             |                          |                    |                    |                      |                    |             |                    |                   |                    |                         |                |
| TT                                | 11.74±0.78 | <b>0.029</b>             | 30.70±6.59  | 0.366                    | 413.98±120.09      | 0.957              | 92.35±17.04          | 0.310              | 15.88±5.10  | 0.338              | 4.73±1.48         | 0.461              | 43.95±11.08             | 0.116          |
| TC                                | 11.85±1.01 |                          | 31.81±14.44 |                          | 417.23±132.87      |                    | 94.76±32.01          |                    | 15.75±6.01  |                    | 4.61±1.50         |                    | 46.83±17.90             |                |
| CC                                | 11.63±0.91 |                          | 32.02±8.91  |                          | 416.04±126.61      |                    | 96.84±18.49          |                    | 16.60±9.54  |                    | 4.60±1.66         |                    | 44.52±11.73             |                |
| Dominant (TT vs TC+CC)            | 11.80±0.99 | 0.424 <sup>c</sup>       | 31.86±13.29 | 0.079 <sup>c</sup>       | 416.95±131.28      | 0.777              | 95.24±29.41          | 0.325 <sup>c</sup> | 15.96±7.07  | 0.646 <sup>c</sup> | 4.61±1.54         | 0.215              | 46.26±16.60             | <b>0.050</b>   |
| Recessive (TT+TC vs CC)           | 11.63±0.91 | <b>0.039</b>             | 32.02±8.91  | 0.074 <sup>c</sup>       | 416.04±126.61      | 0.994              | 96.84±18.49          | 0.111 <sup>c</sup> | 16.60±9.54  | 0.550 <sup>c</sup> | 4.60±1.66         | 0.624              | 44.52±11.73             | 0.457          |
| <b><i>PAI-I 11053T&gt;G</i></b>   |            |                          |             |                          |                    |                    |                      |                    |             |                    |                   |                    |                         |                |
| TT                                | 11.68±0.83 | 0.085                    | 32.06±8.62  | 0.235                    | 409.59±129.51      | 0.527              | 94.32±18.05          | 0.872              | 15.74±4.76  | 0.755              | 4.62±1.48         | 0.930              | 44.18±11.62             | 0.670          |
| TG                                | 11.84±1.01 |                          | 31.71±14.49 |                          | 415.04±128.41      |                    | 94.71±32.86          |                    | 16.09±7.72  |                    | 4.65±1.53         |                    | 46.70±18.18             |                |
| GG                                | 11.75±0.83 |                          | 30.32±6.29  |                          | 424.94±123.96      |                    | 93.39±16.34          |                    | 15.85±5.26  |                    | 4.67±1.55         |                    | 44.63±11.23             |                |
| Dominant (TT vs TG+GG)            | 11.81±0.95 | <b>0.025<sup>c</sup></b> | 31.24±12.36 | <b>0.013<sup>c</sup></b> | 418.39±126.88      | 0.426              | 94.28±28.48          | 0.435 <sup>c</sup> | 16.01±6.99  | 0.674 <sup>c</sup> | 4.66±1.54         | 0.729              | 45.97±16.07             | 0.152          |
| Recessive (TT+TG vs GG)           | 11.75±0.83 | 0.625 <sup>c</sup>       | 30.32±6.29  | <b>0.013<sup>c</sup></b> | 424.94±123.96      | 0.301              | 93.39±16.34          | 0.879 <sup>c</sup> | 15.85±5.26  | 0.939 <sup>c</sup> | 4.67±1.55         | 0.789              | 44.63±11.23             | 0.387          |
| <b><i>PAI-I 12068G&gt;A</i></b>   |            |                          |             |                          |                    |                    |                      |                    |             |                    |                   |                    |                         |                |
| GG                                | 11.77±0.79 | 0.985                    | 31.54±16.44 | 0.835                    | 425.24±121.06      | 0.329              | 93.07±20.12          | 0.676              | 15.89±5.08  | 0.745              | 4.65±1.51         | 0.949              | 44.98±11.12             | 0.350          |
| GA                                | 11.78±1.02 |                          | 31.27±7.83  |                          | 409.00±124.16      |                    | 94.82±31.06          |                    | 15.85±6.12  |                    | 4.64±1.46         |                    | 46.26±18.11             |                |
| AA                                | 11.78±0.89 |                          | 31.95±6.12  |                          | 417.80±150.53      |                    | 95.24±18.87          |                    | 16.31±9.63  |                    | 4.69±1.72         |                    | 44.17±11.58             |                |
| Dominant (GG vs GA+AA)            | 11.78±0.99 | 0.800 <sup>c</sup>       | 31.43±7.47  | <b>0.039<sup>c</sup></b> | 411.08±130.74      | 0.174              | 94.92±28.59          | 0.491 <sup>c</sup> | 15.96±7.10  | 0.429 <sup>c</sup> | 4.65±1.53         | 0.973              | 45.73±16.73             | 0.517          |
| Recessive (GG+GA vs AA)           | 11.78±0.89 | 0.917                    | 31.95±6.12  | <b>0.004<sup>c</sup></b> | 417.80±150.53      | 0.575 <sup>c</sup> | 95.24±18.87          | 0.658 <sup>c</sup> | 16.31±9.63  | 0.962 <sup>c</sup> | 4.69±1.72         | 0.690 <sup>c</sup> | 44.17±11.58             | 0.311          |

ANOVA, analysis of variance; PT, prothrombin time; aPTT, activated partial thromboplastin time; SD, standard deviation; N/A, not applicable.

<sup>a</sup>Calculated using ANOVA. <sup>b</sup>Calculated using the Kruskal-Wallis test. <sup>c</sup>Calculated using the Mann-Whitney test.

Supplementary Table S11. Baseline characteristics between ischemic stroke patients and control subjects in sample 1 and 2

| Characteristic                      | Sample 1*        |                         |                    | Sample2**        |                         |            |
|-------------------------------------|------------------|-------------------------|--------------------|------------------|-------------------------|------------|
|                                     | Controls (n=259) | Stroke patients (n=205) | <i>P</i> *         | Controls (n=166) | Stroke patients (n=369) | <i>P</i> * |
|                                     | 259              | 205                     |                    | 166              | 369                     |            |
| Male (%)                            | 95 (36.7)        | 84 (41.0)               | 0.3456             | 78 (47.0)        | 150 (40.7)              | 0.171      |
| Age (years, mean ±SD)               | 62.9±10.5        | 62.1±10.7               | 0.376              | 62.2±11.2        | 62.9±12.0               | 0.713      |
| Smoking (%)                         | 72 (27.8)        | 71 (35.7)               | 0.072              | 66 (39.8)        | 135 (36.7)              | 0.498      |
| Metabolic syndrome (%)              | 29 (11.2)        | 67 (32.7)               | < 0.0001           | 19 (11.4)        | 120 (32.5)              | < 0.0001   |
| Hypertension (%)                    | 107 (41.3)       | 124 (60.5)              | < 0.0001           | 63 (38.0)        | 238 (64.5)              | < 0.0001   |
| Diabetes mellitus (%)               | 36 (13.9)        | 54 (26.3)               | 0.001              | 20 (12.0)        | 92 (24.9)               | < 0.0001   |
| Hyperlipidemia (%)                  | 66 (25.5)        | 78 (38.0)               | 0.004              | 35 (21.1)        | 103 (27.9)              | 0.095      |
| BMI (kg/m <sup>2</sup> , mean ±SD)  | 24.3±3.3         | 23.9±3.0                | 0.215 <sup>a</sup> | 24.2±3.2         | 24.3±3.2                | 0.653      |
| HDL-C (mg/dl, mean ±SD)             | 46.5±16.6        | 44.7±18.2               | 0.075              | 47.0±11.0        | 47.0±11.0               | 0.249      |
| Homocysteine (μmol/L, mean ±SD)     | 9.6±3.5          | 11.1±4.9                | 0.001              | 10.5±4.9         | 11.2±7.5                | 0.379      |
| Folate (nmol/L, mean±SD)            | 9.3±8.7          | 6.6±5.1                 | < 0.0001           | 8.2±6.5          | 7.2±5.2                 | 0.006      |
| Vitamin B12 (pg/ml, mean ±SD)       | 762.1±819.3      | 837.1±942.0             | 0.415              | 713.2±310.2      | 687.0±320.1             | 0.195      |
| Total cholesterol (mg/dl, mean ±SD) | 197.4±40.0       | 193.6±43.2              | 0.224              | 188.8±33.6       | 190.2±38.5              | 0.632      |
| Triglyceride (mg/dl, mean ±SD)      | 152.1±92.6       | 164.3±120.9             | 0.647              | 136.6±82.1       | 144.6±88.1              | 0.330      |
| PLT (10 <sup>3</sup> /μl, mean ±SD) | 243.0±59.0       | 255.1±89.9              | 0.667              | 243.0±77.0       | 246.5±86.6              | 0.915      |
| PT (sec, mean ±SD)                  | 11.8±0.9         | 11.9±0.7                | 0.307              | 11.7±0.7         | 11.7±1.1                | 0.779      |
| aPTT (sec, mean ±SD)                | 34.2±22.5        | 31.2±4.8                | 0.207              | 32.3±10.9        | 30.0±4.2                | 0.139      |
| Fibrinogen (mg/dl, mean ±SD)        | 362.7±91.8       | 400.0±119.5             | 0.021              | 410.6±130.0      | 433.0±132.4             | 0.161      |
| Antithrombin III (% , mean ±SD)     | 86.5±18.4        | 95.6±21.9               | 0.005              | 98.6±52.0        | 93.6±16.9               | 0.788      |
| BUN (mg/dl, mean ±SD)               | 15.7±5.0         | 15.8±6.3                | 0.352              | 16.0±5.0         | 16.1±7.9                | 0.483      |
| Uric Acid (mg/dl, mean ±SD)         | 4.6±1.4          | 4.8±1.5                 | 0.401              | 4.6±1.5          | 4.6±1.6                 | 0.429      |

SD, standard deviation; BMI, body mass index; HDL-C, high density lipoprotein cholesterol; PLT, platelet; PT, prothrombin time; aPTT, activated partial thromboplastin time; BUN, blood urea nitrogen.

\* *P*-values were calculated by Mann-Whitney test for continuous variables and chi-square test for categorical variables.

<sup>a</sup> *P*-values were calculated by two-sided t- test for continuous variables.

\* Sample 1 was recruited from 2001 to 2006. \*\* Sample 2 was recruited from 2007 to 2010.

**Supplementary Table S12. Genotype frequency of *PAI-I* seven polymorphisms between ischemic stroke patients and control subjects in samples 1 and 2**

| Genotype                | Sample 1**          |                            |                     |       |       | Sample 2***         |                            |                     |        |       |
|-------------------------|---------------------|----------------------------|---------------------|-------|-------|---------------------|----------------------------|---------------------|--------|-------|
|                         | Controls<br>(n=259) | Stroke patients<br>(n=205) | AOR (95% CI)*       | P     | FDR-P | Controls<br>(n=166) | Stroke patients<br>(n=369) | AOR (95% CI)*       | P      | FDR-P |
| <i>PAI-I</i> -844G>A    |                     |                            |                     |       |       |                     |                            |                     |        |       |
| GG                      | 101 (39.0)          | 63 (30.7)                  |                     |       |       | 61 (36.7)           | 138 (37.4)                 |                     |        |       |
| GA                      | 117 (45.2)          | 108 (52.7)                 | 1.286 (0.829-1.995) | 0.262 | 0.459 | 74 (44.6)           | 184 (49.9)                 | 1.009 (0.659-1.547) | 0.966  | 0.966 |
| AA                      | 41 (15.8)           | 34 (16.6)                  | 1.734 (0.942-3.193) | 0.077 | 0.462 | 31 (18.7)           | 47 (12.7)                  | 0.684 (0.384-1.215) | 0.195  | 0.236 |
| Dominant                |                     |                            | 1.370 (0.908-2.065) | 0.133 | 0.364 |                     |                            | 0.898 (0.603-1.337) | 0.597  | 0.758 |
| Recessive               |                     |                            | 1.341 (0.796-2.261) | 0.270 | 0.405 |                     |                            | 0.612 (0.362-1.037) | 0.068  | 0.459 |
| <i>PAI-I</i> -675 4G>5G |                     |                            |                     |       |       |                     |                            |                     |        |       |
| 4G4G                    | 116 (44.8)          | 89 (43.4)                  |                     |       |       | 66 (39.8)           | 129 (35.0)                 |                     |        |       |
| 4G5G                    | 110 (42.5)          | 83 (40.5)                  | 0.853 (0.560-1.299) | 0.458 | 0.628 | 78 (47.0)           | 169 (45.8)                 | 1.184 (0.776-1.808) | 0.433  | 0.758 |
| 5G5G                    | 33 (12.7)           | 33 (16.1)                  | 1.443 (0.783-2.661) | 0.240 | 0.480 | 22 (13.3)           | 71 (19.2)                  | 1.586 (0.875-2.876) | 0.129  | 0.236 |
| Dominant                |                     |                            | 0.943 (0.638-1.396) | 0.770 | 0.799 |                     |                            | 1.271 (0.855-1.890) | 0.236  | 0.551 |
| Recessive               |                     |                            | 1.466 (0.839-2.562) | 0.179 | 0.358 |                     |                            | 1.476 (0.862-2.525) | 0.156  | 0.628 |
| <i>PAI-I</i> 43G>A      |                     |                            |                     |       |       |                     |                            |                     |        |       |
| GG                      | 207 (79.9)          | 181 (88.3)                 |                     |       |       | 141 (84.9)          | 310 (84.0)                 |                     |        |       |
| GA                      | 48 (18.5)           | 21 (10.2)                  | 0.511 (0.284-0.918) | 0.025 | 0.088 | 22 (13.3)           | 57 (15.4)                  | 1.263 (0.724-2.204) | 0.412  | 0.758 |
| AA                      | 4 (1.5)             | 3 (1.5)                    | 1.200 (0.244-5.898) | 0.822 | 0.822 | 3 (1.8)             | 2 (0.5)                    | 0.256 (0.041-1.618) | 0.148  | 0.236 |
| Dominant                |                     |                            | 0.559 (0.321-0.976) | 0.041 | 0.287 |                     |                            | 1.131 (0.664-1.927) | 0.650  | 0.758 |
| Recessive               |                     |                            | 1.353 (0.275-6.660) | 0.710 | 0.710 |                     |                            | 0.247 (0.039-1.559) | 0.137  | 0.088 |
| <i>PAI-I</i> 9785G>A    |                     |                            |                     |       |       |                     |                            |                     |        |       |
| GG                      | 240 (92.7)          | 184 (89.8)                 |                     |       |       | 156 (94.0)          | 347 (94.0)                 |                     |        |       |
| GA                      | 18 (6.9)            | 20 (9.8)                   | 1.248 (0.616-2.526) | 0.538 | 0.628 | 10 (6.0)            | 22 (6.0)                   | 1.026 (0.459-2.291) | 0.951  | 0.966 |
| AA                      | 1 (0.4)             | 1 (0.5)                    | N/A                 | N/A   |       | 0 (0.0)             | 0 (0.0)                    | N/A                 | N/A    |       |
| Dominant                |                     |                            | 1.182 (0.590-2.370) | 0.637 | 0.799 |                     |                            | 1.026 (0.459-2.291) | 0.951  | 0.951 |
| Recessive               |                     |                            | N/A                 | N/A   |       |                     |                            | N/A                 | N/A    |       |
| <i>PAI-I</i> 10692T>C   |                     |                            |                     |       |       |                     |                            |                     |        |       |
| TT                      | 98 (37.8)           | 76 (37.1)                  |                     |       |       | 61 (36.7)           | 109 (29.5)                 |                     |        |       |
| TC                      | 128 (49.4)          | 100 (48.8)                 | 1.009 (0.666-1.530) | 0.965 | 0.965 | 76 (45.8)           | 187 (50.7)                 | 1.679 (1.076-2.618) | 0.022  | 0.077 |
| CC                      | 33 (12.7)           | 29 (14.1)                  | 1.245 (0.661-2.345) | 0.498 | 0.747 | 29 (17.5)           | 73 (19.8)                  | 1.457 (0.822-2.582) | 0.197  | 0.236 |
| Dominant                |                     |                            | 1.053 (0.706-1.571) | 0.799 | 0.799 |                     |                            | 1.597 (1.060-2.408) | 0.025  | 0.088 |
| Recessive               |                     |                            | 1.204 (0.680-2.133) | 0.524 | 0.629 |                     |                            | 1.155 (0.700-1.904) | 0.573  | 0.628 |
| <i>PAI-I</i> 11053T>G   |                     |                            |                     |       |       |                     |                            |                     |        |       |
| TT                      | 65 (25.1)           | 64 (31.2)                  |                     |       |       | 43 (25.9)           | 102 (27.6)                 |                     |        |       |
| TG                      | 139 (53.7)          | 81 (39.5)                  | 0.570 (0.355-0.916) | 0.020 | 0.088 | 78 (47.0)           | 186 (50.4)                 | 0.964 (0.608-1.527) | 0.875  | 0.966 |
| GG                      | 55 (21.2)           | 60 (29.3)                  | 1.082 (0.627-1.864) | 0.778 | 0.822 | 45 (27.1)           | 81 (22.0)                  | 0.745 (0.437-1.271) | 0.281  | 0.281 |
| Dominant                |                     |                            | 0.731 (0.473-1.128) | 0.156 | 0.364 |                     |                            | 0.888 (0.576-1.371) | 0.593  | 0.758 |
| Recessive               |                     |                            | 1.579 (1.012-2.465) | 0.044 | 0.264 |                     |                            | 0.737 (0.473-1.148) | 0.177  | 0.965 |
| <i>PAI-I</i> 12068G>A   |                     |                            |                     |       |       |                     |                            |                     |        |       |
| GG                      | 96 (37.1)           | 90 (43.9)                  |                     |       |       | 67 (40.4)           | 100 (27.1)                 |                     |        |       |
| GA                      | 135 (52.1)          | 82 (40.0)                  | 0.729 (0.477-1.113) | 0.143 | 0.334 | 75 (45.2)           | 201 (54.5)                 | 2.158 (1.385-3.361) | 0.001  | 0.007 |
| AA                      | 28 (10.8)           | 33 (16.1)                  | 1.474 (0.792-2.742) | 0.221 | 0.480 | 24 (14.5)           | 68 (18.4)                  | 2.014 (1.111-3.650) | 0.021  | 0.126 |
| Dominant                |                     |                            | 0.841 (0.565-1.251) | 0.392 | 0.686 |                     |                            | 2.128 (1.408-3.217) | 0.0003 | 0.002 |
| Recessive               |                     |                            | 1.625 (0.917-2.877) | 0.096 | 0.288 |                     |                            | 1.342 (0.790-2.281) | 0.277  | 0.088 |

AOR, adjusted odds ratio; 95% CI, 95% confidence interval; N/A, not applicable; FDR, false discovery rate.

\* Adjusted by age, sex, hypertension, diabetes mellitus, hyperlipidemia, and smoking.

\*\* Sample 1 was recruited from 2001 to 2006. \*\*\* Sample 2 was recruited from 2007 to 2010.

**Supplementary Table S13. Comparison of genotype frequencies of *PAI-1* seven polymorphisms between ischemic stroke subtype with large-artery disease and control subjects in sample 1 and 2**

| Genotype                | Sample 1**          |               |                     |       |       | Sample 2***         |                |                     |       |       |
|-------------------------|---------------------|---------------|---------------------|-------|-------|---------------------|----------------|---------------------|-------|-------|
|                         | Controls<br>(n=259) | LAD<br>(n=78) | AOR(95% CI)*        | P     | FDR-P | Controls<br>(n=166) | LAD<br>(n=122) | AOR(95% CI)*        | P     | FDR-P |
| <i>PAI-1</i> -844G>A    |                     |               |                     |       |       |                     |                |                     |       |       |
| GG                      | 101 (39.0)          | 29 (37.2)     | 1.000 (reference)   |       |       | 61 (36.7)           | 52 (42.6)      | 1.000 (reference)   |       |       |
| GA                      | 117 (45.2)          | 36 (46.2)     | 0.812 (0.443-1.489) | 0.500 | 0.775 | 74 (44.6)           | 60 (49.2)      | 0.932 (0.540-1.608) | 0.801 | 0.801 |
| AA                      | 41 (15.8)           | 13 (16.7)     | 1.338 (0.587-3.048) | 0.489 | 0.611 | 31 (18.7)           | 10 (8.2)       | 0.310 (0.127-0.759) | 0.010 | 0.050 |
| Dominant                |                     |               | 0.930 (0.532-1.623) | 0.797 | 0.920 |                     |                | 0.724 (0.430-1.218) | 0.223 | 0.469 |
| Recessive               |                     |               | 1.379 (0.668-2.850) | 0.385 | 0.385 |                     |                | 0.317 (0.139-0.724) | 0.006 | 0.030 |
| <i>PAI-1</i> -675 4G>5G |                     |               |                     |       |       |                     |                |                     |       |       |
| 4G4G                    | 116 (44.8)          | 32 (41.0)     | 1.000 (reference)   |       |       | 66 (39.8)           | 42 (34.4)      | 1.000 (reference)   |       |       |
| 4G5G                    | 110 (42.5)          | 32 (41.0)     | 0.877 (0.484-1.588) | 0.664 | 0.775 | 78 (47.0)           | 60 (49.2)      | 1.373 (0.785-2.402) | 0.267 | 0.623 |
| 5G5G                    | 33 (12.7)           | 14 (17.9)     | 1.896 (0.823-4.369) | 0.133 | 0.260 | 22 (13.3)           | 20 (16.4)      | 1.249 (0.551-2.827) | 0.595 | 0.728 |
| Dominant                |                     |               | 1.028 (0.596-1.774) | 0.920 | 0.920 |                     |                | 1.347 (0.795-2.284) | 0.268 | 0.469 |
| Recessive               |                     |               | 1.865 (0.890-3.911) | 0.099 | 0.242 |                     |                | 1.105 (0.550-2.221) | 0.778 | 0.933 |
| <i>PAI-1</i> 43G>A      |                     |               |                     |       |       |                     |                |                     |       |       |
| GG                      | 207 (79.9)          | 69 (88.5)     | 1.000 (reference)   |       |       | 141 (84.9)          | 103 (84.4)     | 1.000 (reference)   |       |       |
| GA                      | 48 (18.5)           | 8 (10.3)      | 0.482 (0.201-1.157) | 0.102 | 0.357 | 22 (13.3)           | 19 (15.6)      | 1.275 (0.619-2.624) | 0.510 | 0.745 |
| AA                      | 4 (1.5)             | 1 (1.3)       | N/A                 | N/A   | N/A   | 3 (1.8)             | 0 (0.0)        | N/A                 | N/A   | N/A   |
| Dominant                |                     |               | 0.523 (0.228-1.199) | 0.126 | 0.441 |                     |                | 1.099 (0.543-2.222) | 0.794 | 0.823 |
| Recessive               |                     |               | N/A                 | N/A   | N/A   |                     |                | N/A                 | N/A   | N/A   |
| <i>PAI-1</i> 9785G>A    |                     |               |                     |       |       |                     |                |                     |       |       |
| GG                      | 240 (92.7)          | 71 (91.0)     | 1.000 (reference)   |       |       | 156 (94.0)          | 116 (95.1)     | 1.000 (reference)   |       |       |
| GA                      | 18 (6.9)            | 7 (9.0)       | 1.338 (0.505-3.546) | 0.558 | 0.775 | 10 (6.0)            | 6 (4.9)        | 0.780 (0.262-2.328) | 0.657 | 0.767 |
| AA                      | 1 (0.4)             | 0 (0.0)       | N/A                 | N/A   | N/A   | 0 (0.0)             | 0 (0.0)        | N/A                 | N/A   | N/A   |
| Dominant                |                     |               | 1.255 (0.478-3.291) | 0.645 | 0.903 |                     |                | 0.780 (0.262-2.328) | 0.657 | 0.823 |
| Recessive               |                     |               | N/A                 | N/A   | N/A   |                     |                | N/A                 | N/A   | N/A   |
| <i>PAI-1</i> 10692T>C   |                     |               |                     |       |       |                     |                |                     |       |       |
| TT                      | 98 (37.8)           | 27 (34.6)     | 1.000 (reference)   |       |       | 61 (36.7)           | 36 (29.5)      | 1.000 (reference)   |       |       |
| TC                      | 128 (49.4)          | 37 (47.4)     | 1.025 (0.568-1.852) | 0.934 | 0.934 | 76 (45.8)           | 68 (55.7)      | 2.106 (1.166-3.803) | 0.014 | 0.049 |
| CC                      | 33 (12.7)           | 14 (17.9)     | 1.831 (0.794-4.222) | 0.156 | 0.260 | 29 (17.5)           | 18 (14.8)      | 1.161 (0.501-2.687) | 0.728 | 0.728 |
| Dominant                |                     |               | 1.163 (0.664-2.036) | 0.598 | 0.903 |                     |                | 1.767 (1.014-3.077) | 0.044 | 0.154 |
| Recessive               |                     |               | 1.760 (0.844-3.671) | 0.132 | 0.242 |                     |                | 0.705 (0.353-1.410) | 0.323 | 0.538 |
| <i>PAI-1</i> 11053T>G   |                     |               |                     |       |       |                     |                |                     |       |       |
| TT                      | 65 (25.1)           | 27 (34.6)     | 1.000 (reference)   |       |       | 43 (25.9)           | 31 (25.4)      | 1.000 (reference)   |       |       |
| TG                      | 139 (53.7)          | 29 (37.2)     | 0.470 (0.246-0.898) | 0.022 | 0.154 | 78 (47.0)           | 63 (51.6)      | 1.213 (0.663-2.220) | 0.532 | 0.745 |
| GG                      | 55 (21.2)           | 22 (28.2)     | 0.853 (0.404-1.802) | 0.677 | 0.677 | 45 (27.1)           | 28 (23.0)      | 0.740 (0.351-1.563) | 0.430 | 0.717 |
| Dominant                |                     |               | 0.587 (0.326-1.056) | 0.075 | 0.441 |                     |                | 1.069 (0.599-1.907) | 0.823 | 0.823 |
| Recessive               |                     |               | 1.389 (0.755-2.553) | 0.291 | 0.364 |                     |                | 0.657 (0.361-1.198) | 0.171 | 0.428 |
| <i>PAI-1</i> 12068G>A   |                     |               |                     |       |       |                     |                |                     |       |       |
| GG                      | 96 (37.1)           | 26 (33.3)     | 1.000 (reference)   |       |       | 67 (40.4)           | 35 (28.7)      | 1.000 (reference)   |       |       |
| GA                      | 135 (52.1)          | 38 (48.7)     | 1.282 (0.697-2.358) | 0.424 | 0.775 | 75 (45.2)           | 69 (56.6)      | 2.663 (1.450-4.891) | 0.002 | 0.014 |
| AA                      | 28 (10.8)           | 14 (17.9)     | 2.234 (0.937-5.322) | 0.070 | 0.260 | 24 (14.5)           | 18 (14.8)      | 1.764 (0.756-4.119) | 0.190 | 0.475 |
| Dominant                |                     |               | 1.416 (0.798-2.514) | 0.235 | 0.548 |                     |                | 2.335 (1.327-4.111) | 0.003 | 0.021 |
| Recessive               |                     |               | 1.743 (0.825-3.684) | 0.145 | 0.242 |                     |                | 0.970 (0.474-1.986) | 0.933 | 0.933 |

AOR, adjusted odds ratio; 95% CI, 95% confidence interval; LAD, large-artery disease; N/A, not applicable; FDR, false discovery rate.

\* Adjusted by age, sex, hypertension, diabetes mellitus, hyperlipidemia, and smoking.

\*\* Sample 1 was recruited from 2001 to 2006. \*\*\* Sample 2 was recruited from 2007 to 2010.

**Supplementary Table S14. Comparison of genotype frequencies of *PAI-1* seven polymorphisms between ischemic stroke subtype with small-vessel disease and control subjects in sample 1 and 2**

| Genotype                | Sample 1**          |               |                     |       |       | Sample 2***         |               |                     |       |       |
|-------------------------|---------------------|---------------|---------------------|-------|-------|---------------------|---------------|---------------------|-------|-------|
|                         | Controls<br>(n=259) | SVD<br>(n=42) | AOR(95% CI)*        | P     | FDR-P | Controls<br>(n=166) | SVD<br>(n=98) | AOR(95% CI)*        | P     | FDR-P |
| <i>PAI-1</i> -844G>A    |                     |               |                     |       |       |                     |               |                     |       |       |
| GG                      | 101 (39.0)          | 14 (33.3)     | 1.000 (reference)   |       |       | 61 (36.7)           | 32 (32.7)     | 1.000 (reference)   |       |       |
| GA                      | 117 (45.2)          | 22 (52.4)     | 0.865 (0.376-1.986) | 0.731 | 0.867 | 74 (44.6)           | 49 (50.0)     | 1.291 (0.716-2.330) | 0.396 | 0.774 |
| AA                      | 41 (15.8)           | 6 (14.3)      | 1.722 (0.514-5.764) | 0.378 | 0.854 | 31 (18.7)           | 17 (17.3)     | 1.085 (0.504-2.335) | 0.835 | 0.835 |
| Dominant                |                     |               | 0.983 (0.458-2.112) | 0.965 | 0.974 |                     |               | 1.177 (0.680-2.036) | 0.561 | 0.785 |
| Recessive               |                     |               | 1.431 (0.529-3.872) | 0.480 | 0.887 |                     |               | 0.873 (0.437-1.744) | 0.701 | 0.701 |
| <i>PAI-1</i> -675 4G>5G |                     |               |                     |       |       |                     |               |                     |       |       |
| 4G4G                    | 116 (44.8)          | 18 (42.9)     | 1.000 (reference)   |       |       | 66 (39.8)           | 37 (37.8)     | 1.000 (reference)   |       |       |
| 4G5G                    | 110 (42.5)          | 20 (47.6)     | 0.918 (0.417-2.021) | 0.831 | 0.867 | 78 (47.0)           | 39 (39.8)     | 0.838 (0.468-1.501) | 0.553 | 0.774 |
| 5G5G                    | 33 (12.7)           | 4 (9.5)       | 1.321 (0.347-5.019) | 0.683 | 0.854 | 22 (13.3)           | 22 (22.4)     | 1.566 (0.734-3.343) | 0.246 | 0.318 |
| Dominant                |                     |               | 0.905 (0.428-1.915) | 0.794 | 0.974 |                     |               | 0.993 (0.580-1.699) | 0.979 | 0.979 |
| Recessive               |                     |               | 1.091 (0.328-3.627) | 0.887 | 0.887 |                     |               | 1.686 (0.857-3.317) | 0.131 | 0.328 |
| <i>PAI-1</i> 43G>A      |                     |               |                     |       |       |                     |               |                     |       |       |
| GG                      | 207 (79.9)          | 40 (95.2)     | 1.000 (reference)   |       |       | 141 (84.9)          | 86 (87.8)     | 1.000 (reference)   |       |       |
| GA                      | 48 (18.5)           | 2 (4.8)       | 0.265 (0.058-1.209) | 0.086 | 0.602 | 22 (13.3)           | 12 (12.2)     | 0.867 (0.395-1.905) | 0.722 | 0.842 |
| AA                      | 4 (1.5)             | 0 (0.0)       | N/A                 | N/A   | N/A   | 3 (1.8)             | 0 (0.0)       | N/A                 | N/A   | N/A   |
| Dominant                |                     |               | 0.258 (0.057-1.172) | 0.079 | 0.553 |                     |               | 0.746 (0.345-1.615) | 0.457 | 0.785 |
| Recessive               |                     |               | N/A                 | N/A   | N/A   |                     |               | N/A                 | N/A   | N/A   |
| <i>PAI-1</i> 9785G>A    |                     |               |                     |       |       |                     |               |                     |       |       |
| GG                      | 240 (92.7)          | 38 (90.5)     | 1.000 (reference)   |       |       | 156 (94.0)          | 92 (93.9)     | 1.000 (reference)   |       |       |
| GA                      | 18 (6.9)            | 4 (9.5)       | 1.113 (0.316-3.915) | 0.867 | 0.867 | 10 (6.0)            | 6 (6.1)       | 0.944 (0.321-2.776) | 0.916 | 0.916 |
| AA                      | 1 (0.4)             | 0 (0.0)       | N/A                 | N/A   | N/A   | 0 (0.0)             | 0 (0.0)       | N/A                 | N/A   | N/A   |
| Dominant                |                     |               | 1.086 (0.311-3.795) | 0.897 | 0.974 |                     |               | 0.944 (0.321-2.776) | 0.916 | 0.979 |
| Recessive               |                     |               | N/A                 | N/A   | N/A   |                     |               | N/A                 | N/A   | N/A   |
| <i>PAI-1</i> 10692T>C   |                     |               |                     |       |       |                     |               |                     |       |       |
| TT                      | 98 (37.8)           | 16 (38.1)     | 1.000 (reference)   |       |       | 61 (36.7)           | 23 (23.5)     | 1.000 (reference)   |       |       |
| TC                      | 128 (49.4)          | 23 (54.8)     | 1.211 (0.567-2.585) | 0.621 | 0.867 | 76 (45.8)           | 48 (49.0)     | 1.730 (0.917-3.265) | 0.091 | 0.319 |
| CC                      | 33 (12.7)           | 3 (7.1)       | 1.007 (0.225-4.516) | 0.992 | 0.992 | 29 (17.5)           | 27 (27.6)     | 2.203 (1.048-4.629) | 0.037 | 0.185 |
| Dominant                |                     |               | 1.160 (0.548-2.453) | 0.699 | 0.974 |                     |               | 1.854 (1.030-3.336) | 0.040 | 0.140 |
| Recessive               |                     |               | 0.718 (0.190-2.705) | 0.624 | 0.887 |                     |               | 1.660 (0.891-3.091) | 0.111 | 0.328 |
| <i>PAI-1</i> 11053T>G   |                     |               |                     |       |       |                     |               |                     |       |       |
| TT                      | 65 (25.1)           | 13 (31.0)     | 1.000 (reference)   |       |       | 43 (25.9)           | 32 (32.7)     | 1.000 (reference)   |       |       |
| TG                      | 139 (53.7)          | 19 (45.2)     | 0.649 (0.273-1.543) | 0.328 | 0.867 | 78 (47.0)           | 47 (48.0)     | 0.808 (0.439-1.486) | 0.492 | 0.774 |
| GG                      | 55 (21.2)           | 10 (23.8)     | 0.719 (0.247-2.095) | 0.545 | 0.854 | 45 (27.1)           | 19 (19.4)     | 0.653 (0.314-1.357) | 0.254 | 0.318 |
| Dominant                |                     |               | 0.670 (0.300-1.496) | 0.328 | 0.974 |                     |               | 0.758 (0.430-1.337) | 0.339 | 0.785 |
| Recessive               |                     |               | 1.127 (0.474-2.677) | 0.787 | 0.887 |                     |               | 0.748 (0.400-1.396) | 0.361 | 0.565 |
| <i>PAI-1</i> 12068G>A   |                     |               |                     |       |       |                     |               |                     |       |       |
| GG                      | 96 (37.1)           | 18 (42.9)     | 1.000 (reference)   |       |       | 67 (40.4)           | 26 (26.5)     | 1.000 (reference)   |       |       |
| GA                      | 135 (52.1)          | 19 (45.2)     | 0.913 (0.415-2.007) | 0.821 | 0.867 | 75 (45.2)           | 53 (54.1)     | 1.914 (1.043-3.515) | 0.036 | 0.252 |
| AA                      | 28 (10.8)           | 5 (11.9)      | 1.462 (0.416-5.137) | 0.554 | 0.854 | 24 (14.5)           | 19 (19.4)     | 1.976 (0.904-4.317) | 0.088 | 0.220 |
| Dominant                |                     |               | 1.013 (0.480-2.135) | 0.974 | 0.974 |                     |               | 1.940 (1.099-3.426) | 0.022 | 0.140 |
| Recessive               |                     |               | 1.419 (0.458-4.397) | 0.544 | 0.887 |                     |               | 1.303 (0.654-2.597) | 0.452 | 0.565 |

AOR, adjusted odds ratio; 95% CI, 95% confidence interval; SVD, small-vessel disease; N/A, not applicable; FDR, false discovery rate.

\* Adjusted by age, sex, hypertension, diabetes mellitus, hyperlipidemia, and smoking.

\*\* Sample 1 was recruited from 2001 to 2006. \*\*\* Sample 2 was recruited from 2007 to 2010.

**Supplementary Table S15. Comparison of genotype frequencies of *PAI-I* seven polymorphisms between ischemic stroke subtype with cardioembolism and control subjects in sample 1 and 2**

| Genotype                | Sample 1**          |              |                      |       |       | Sample 2***         |              |                     |       |       |
|-------------------------|---------------------|--------------|----------------------|-------|-------|---------------------|--------------|---------------------|-------|-------|
|                         | Controls<br>(n=259) | CE<br>(n=21) | AOR(95% CI)*         | P     | FDR-P | Controls<br>(n=166) | CE<br>(n=31) | AOR(95% CI)*        | P     | FDR-P |
| <i>PAI-I</i> -844G>A    |                     |              |                      |       |       |                     |              |                     |       |       |
| GG                      | 101 (39.0)          | 6 (28.6)     | 1.000 (reference)    |       |       | 61 (36.7)           | 14 (45.2)    | 1.000 (reference)   |       |       |
| GA                      | 117 (45.2)          | 13 (61.9)    | 1.504 (0.519-4.355)  | 0.452 | 0.981 | 74 (44.6)           | 11 (35.5)    | 0.377 (0.140-1.016) | 0.054 | 0.324 |
| AA                      | 41 (15.8)           | 2 (9.5)      | 0.869 (0.155-4.856)  | 0.873 | 0.873 | 31 (18.7)           | 6 (19.4)     | 0.910 (0.289-2.868) | 0.871 | 0.871 |
| Dominant                |                     |              | 1.393 (0.501-3.874)  | 0.525 | 0.859 |                     |              | 0.505 (0.215-1.186) | 0.117 | 0.702 |
| Recessive               |                     |              | 0.613 (0.135-2.788)  | 0.527 | 0.659 |                     |              | 1.266 (0.441-3.635) | 0.662 | 0.763 |
| <i>PAI-I</i> -675 4G>5G |                     |              |                      |       |       |                     |              |                     |       |       |
| 4G4G                    | 116 (44.8)          | 7 (33.3)     | 1.000 (reference)    |       |       | 66 (39.8)           | 10 (32.3)    | 1.000 (reference)   |       |       |
| 4G5G                    | 110 (42.5)          | 8 (38.1)     | 1.013 (0.344-2.990)  | 0.981 | 0.981 | 78 (47.0)           | 13 (41.9)    | 1.131 (0.444-2.886) | 0.796 | 0.955 |
| 5G5G                    | 33 (12.7)           | 6 (28.6)     | 3.788 (1.059-13.545) | 0.041 | 0.205 | 22 (13.3)           | 8 (25.8)     | 2.029 (0.658-6.260) | 0.218 | 0.812 |
| Dominant                |                     |              | 1.522 (0.585-3.960)  | 0.390 | 0.859 |                     |              | 1.372 (0.587-3.206) | 0.465 | 0.904 |
| Recessive               |                     |              | 3.883 (1.294-11.654) | 0.016 | 0.080 |                     |              | 2.003 (0.746-5.377) | 0.168 | 0.740 |
| <i>PAI-I</i> 43G>A      |                     |              |                      |       |       |                     |              |                     |       |       |
| GG                      | 207 (79.9)          | 17 (81.0)    | 1.000 (reference)    |       |       | 141 (84.9)          | 25 (80.6)    | 1.000 (reference)   |       |       |
| GA                      | 48 (18.5)           | 4 (19.0)     | 1.105 (0.349-3.500)  | 0.865 | 0.981 | 22 (13.3)           | 6 (19.4)     | 1.737 (0.600-5.024) | 0.308 | 0.924 |
| AA                      | 4 (1.5)             | 0 (0.0)      | N/A                  | N/A   | N/A   | 3 (1.8)             | 0 (0.0)      | N/A                 | N/A   | N/A   |
| Dominant                |                     |              | 1.030 (0.326-3.253)  | 0.960 | 0.960 |                     |              | 1.514 (0.532-4.313) | 0.437 | 0.904 |
| Recessive               |                     |              | N/A                  | N/A   | N/A   |                     |              | N/A                 | N/A   | N/A   |
| <i>PAI-I</i> 9785G>A    |                     |              |                      |       |       |                     |              |                     |       |       |
| GG                      | 240 (92.7)          | 20 (95.2)    | 1.000 (reference)    |       |       | 156 (94.0)          | 31 (100.0)   | 1.000 (reference)   |       |       |
| GA                      | 18 (6.9)            | 1 (4.8)      | 0.728 (0.090-5.892)  | 0.766 | 0.981 | 10 (6.0)            | 0 (0.0)      | N/A                 | N/A   | N/A   |
| AA                      | 1 (0.4)             | 0 (0.0)      | N/A                  | N/A   | N/A   | 0 (0.0)             | 0 (0.0)      | N/A                 | N/A   | N/A   |
| Dominant                |                     |              | 0.698 (0.087-5.625)  | 0.736 | 0.859 |                     |              | N/A                 | N/A   | N/A   |
| Recessive               |                     |              | N/A                  | N/A   | N/A   |                     |              | N/A                 | N/A   | N/A   |
| <i>PAI-I</i> 10692T>C   |                     |              |                      |       |       |                     |              |                     |       |       |
| TT                      | 98 (37.8)           | 7 (33.3)     | 1.000 (reference)    |       |       | 61 (36.7)           | 10 (32.3)    | 1.000 (reference)   |       |       |
| TC                      | 128 (49.4)          | 10 (47.6)    | 1.097 (0.400-3.006)  | 0.858 | 0.981 | 76 (45.8)           | 18 (58.1)    | 1.164 (0.466-2.904) | 0.745 | 0.955 |
| CC                      | 33 (12.7)           | 4 (19.0)     | 2.394 (0.578-9.910)  | 0.228 | 0.380 | 29 (17.5)           | 3 (9.7)      | 0.495 (0.113-2.168) | 0.351 | 0.812 |
| Dominant                |                     |              | 1.251 (0.479-3.269)  | 0.648 | 0.859 |                     |              | 1.028 (0.434-2.435) | 0.951 | 0.951 |
| Recessive               |                     |              | 1.809 (0.550-5.946)  | 0.329 | 0.548 |                     |              | 0.494 (0.132-1.855) | 0.296 | 0.740 |
| <i>PAI-I</i> 11053T>G   |                     |              |                      |       |       |                     |              |                     |       |       |
| TT                      | 65 (25.1)           | 7 (33.3)     | 1.000 (reference)    |       |       | 43 (25.9)           | 7 (22.6)     | 1.000 (reference)   |       |       |
| TG                      | 139 (53.7)          | 11 (52.4)    | 0.597 (0.208-1.718)  | 0.339 | 0.981 | 78 (47.0)           | 15 (48.4)    | 0.974 (0.344-2.759) | 0.960 | 0.960 |
| GG                      | 55 (21.2)           | 3 (14.3)     | 0.613 (0.160-2.351)  | 0.476 | 0.595 | 45 (27.1)           | 9 (29.0)     | 1.503 (0.477-4.737) | 0.487 | 0.812 |
| Dominant                |                     |              | 0.638 (0.241-1.688)  | 0.365 | 0.859 |                     |              | 1.168 (0.444-3.073) | 0.753 | 0.904 |
| Recessive               |                     |              | 0.857 (0.274-2.677)  | 0.790 | 0.790 |                     |              | 1.299 (0.530-3.186) | 0.567 | 0.763 |
| <i>PAI-I</i> 12068G>A   |                     |              |                      |       |       |                     |              |                     |       |       |
| GG                      | 96 (37.1)           | 7 (33.3)     | 1.000 (reference)    |       |       | 67 (40.4)           | 11 (35.5)    | 1.000 (reference)   |       |       |
| GA                      | 135 (52.1)          | 10 (47.6)    | 1.089 (0.395-3.002)  | 0.869 | 0.981 | 75 (45.2)           | 15 (48.4)    | 1.198 (0.478-3.003) | 0.701 | 0.955 |
| AA                      | 28 (10.8)           | 4 (19.0)     | 2.357 (0.592-9.387)  | 0.224 | 0.380 | 24 (14.5)           | 5 (16.1)     | 1.247 (0.364-4.276) | 0.726 | 0.871 |
| Dominant                |                     |              | 1.274 (0.489-3.317)  | 0.621 | 0.859 |                     |              | 1.202 (0.519-2.779) | 0.668 | 0.904 |
| Recessive               |                     |              | 1.901 (0.576-6.274)  | 0.292 | 0.548 |                     |              | 1.189 (0.386-3.664) | 0.763 | 0.763 |

AOR, adjusted odds ratio; 95% CI, 95% confidence interval; CE, cardioembolism; N/A, not applicable; FDR, false discovery rate.

\* Adjusted by age, sex, hypertension, diabetes mellitus, hyperlipidemia, and smoking.

\*\* Sample 1 was recruited from 2001 to 2006. \*\*\* Sample 2 was recruited from 2007 to 2010.

Supplementary Table S16. Clinical variables in ischemic stroke patients stratified by *PAI-1* -844GA/-675 5G genotype

| Genotype                            | Homocysteine<br>(mmol/L) |                       | Folate<br>(mg/ml) |                       | Vitamin B12<br>(pg/ml) |                       | Total cholesterol<br>(mg/dl) |                       | Triglyceride<br>(mg/dl) |                       | PLT<br>(10 <sup>3</sup> /μℓ) |                       | BMI<br>(kg/m <sup>2</sup> )              |                       |
|-------------------------------------|--------------------------|-----------------------|-------------------|-----------------------|------------------------|-----------------------|------------------------------|-----------------------|-------------------------|-----------------------|------------------------------|-----------------------|------------------------------------------|-----------------------|
|                                     | Mean ± SD                | <i>P</i> <sup>a</sup> | Mean ± SD         | <i>P</i> <sup>a</sup> | Mean ± SD              | <i>P</i> <sup>a</sup> | Mean ± SD                    | <i>P</i> <sup>a</sup> | Mean ± SD               | <i>P</i> <sup>a</sup> | Mean ± SD                    | <i>P</i> <sup>a</sup> | Mean ± SD                                | <i>P</i> <sup>a</sup> |
| <i>PAI-1</i> -844 G>A/-675 4G>5G(N) |                          |                       |                   |                       |                        |                       |                              |                       |                         |                       |                              |                       |                                          |                       |
| GG+4G4G(79)                         | 10.02±4.10               | 0.976                 | 7.48±4.50         | 0.420                 | 716.39±378.36          | 0.248                 | 189.04±36.12                 | <b>0.013</b>          | 143.67±105.36           | 0.143                 | 253.37±129.99                | 0.489                 | 23.23±3.25                               | <b>0.011</b>          |
| GA+5G5G(20)                         | 9.99±2.97                |                       | 6.55±4.06         |                       | 910.37±1227.04         |                       | 212.53±35.81                 |                       | 184.11±111.67           |                       | 232.75±47.03                 |                       | 25.66±4.03                               |                       |
| Genotype                            | PT<br>(sec)              |                       | aPTT<br>(sec)     |                       | Fibrinogen<br>(mg/dl)  |                       | Antithrombin III<br>(%)      |                       | BUN<br>(mg/dl)          |                       | Uric acid<br>(mg/dl)         |                       | HDL-cholesterol<br>(10 <sup>3</sup> /μℓ) |                       |
|                                     | Mean ± SD                | <i>P</i> <sup>a</sup> | Mean ± SD         | <i>P</i> <sup>a</sup> | Mean ± SD              | <i>P</i> <sup>a</sup> | Mean ± SD                    | <i>P</i> <sup>a</sup> | Mean ± SD               | <i>P</i> <sup>a</sup> | Mean ± SD                    | <i>P</i> <sup>a</sup> | Mean ± SD                                | <i>P</i> <sup>a</sup> |
| <i>PAI-1</i> -844 G>A/-675 4G>5G    |                          |                       |                   |                       |                        |                       |                              |                       |                         |                       |                              |                       |                                          |                       |
| GG+4G4G(79)                         | 11.92±1.06               | 0.236                 | 32.37±10.34       | 0.376                 | 424.68±149.96          | 0.628                 | 91.77±18.51                  | 0.418                 | 16.38±5.99              | 0.168                 | 4.35±1.39                    | <b>0.041</b>          | 44.40±17.70                              | 0.829                 |
| GA+5G5G(20)                         | 11.62±0.66               |                       | 30.25±4.53        |                       | 404.31±132.60          |                       | 96.28±23.50                  |                       | 14.45±3.13              |                       | 5.12±1.73                    |                       | 45.44±13.64                              |                       |

PLT, platelet; BMI, body mass index; PT, prothrombin time; aPTT, activated partial thromboplastin time; HDL-cholesterol, high-density lipoprotein cholesterol; SD, standard deviation. <sup>a</sup> Calculated using Student's t-test
